# Supplementary material for: Four and a Half LIM Domains 1b (Fhl1b) Is Essential for Regulating the Liver versus Pancreas Fate Decision and for β-Cell Regeneration
Source: PLoS Genet. 2016 Feb 4;12(2):e1005831. doi: 10.1371/journal.pgen.1005831 (PMC4741517; doi:10.1371/journal.pgen.1005831)
Supplement: S1 Table — 998 genes with at least 2-fold changes are shown. (XLSX) [file pgen.1005831.s016.xlsx]

## Sheet: Sheet1
Accession #	Sequence Description	Fold Change	p-value
ENSDART00000104204	forkhead box G1 [Source:RefSeq_peptide;Acc:NP_571142] [ENSDART00000104204]	-54.6116	3.84e-22
NM_130961	Danio rerio lefty2 (lft2), mRNA [NM_130961]	-33.0214	8.44e-20
XM_685829	PREDICTED: Danio rerio similar to MGC80493 protein (LOC562449), mRNA [XM_685829]	-24.0356	1.28e-17
NM_213523	Danio rerio zgc:55334 (zgc:55334), mRNA [NM_213523]	-21.4239	1.39e-16
NM_198916	Danio rerio forkhead box I2 (foxi2), mRNA [NM_198916]	-20.6139	2.69e-16
NM_001004668	Danio rerio zgc:103639 (zgc:103639), mRNA [NM_001004668]	-16.0124	1.06e-13
NM_001003488	Danio rerio zgc:92037 (zgc:92037), mRNA [NM_001003488]	-15.7829	3.81e-14
ENSDART00000010373	Krt1-19d protein (Fragment). [Source:Uniprot/SPTREMBL;Acc:Q05AP7] [ENSDART00000010373]	-15.1729	1.21e-21
BC134025	Danio rerio otolith matrix protein, mRNA (cDNA clone MGC:162543 IMAGE:7163248), complete cds. [BC134025]	-12.4757	6.5e-20
NM_131067	Danio rerio forkhead box G1 (foxg1), mRNA [NM_131067]	-11.8773	2.54e-19
ENSDART00000104610	Danio rerio homeobox transcription factor (Hmx2) mRNA, complete cds. [EU050650]	-11.8703	2.21e-12
NM_001007457	Danio rerio zgc:101606 (zgc:101606), mRNA [NM_001007457]	-11.115	2.79e-16
NM_131041	Danio rerio neurogenin 1 (neurog1), mRNA [NM_131041]	-10.6763	3.55e-27
NM_201196	Danio rerio zgc:65884 (zgc:65884), mRNA [NM_201196]	-10.1709	1.91e-15
NM_001048063	Danio rerio neuronal nicotinic acetylcholine receptor alpha 4 subunit (LOC556619), mRNA [NM_001048063]	-9.91659	8.96e-09
BC139611	Danio rerio cDNA clone IMAGE:7156068. [BC139611]	-9.90164	2.23e-08
NM_131516	Danio rerio parvalbumin 2 (pvalb2), mRNA [NM_131516]	-9.85078	4.83e-15
NM_200000	Danio rerio zgc:77231 (zgc:77231), mRNA [NM_200000]	-9.75775	0
NM_001024949	Danio rerio BarH-like homeobox 1 (barx1), mRNA [NM_001024949]	-9.48975	2.91e-13
XR_029691	PREDICTED: Danio rerio hypothetical LOC562930 (LOC562930), mRNA [XR_029691]	-9.4619	6.22e-08
NM_131634	Danio rerio homeo box (H6 family) 3 (hmx3), mRNA [NM_131634]	-9.002	2.23e-18
ENSDART00000077352	PREDICTED: Danio rerio hypothetical LOC556869 (LOC556869), mRNA [XM_679791]	-8.84366	2.83e-07
NM_214807	Danio rerio fatty acid binding protein 7, brain, b (fabp7b), mRNA [NM_214807]	-8.62059	5.56e-17
NM_131783	Danio rerio sine oculis homeobox homolog 2.1 (six2.1), mRNA [NM_131783]	-8.52841	1.58e-09
NM_131227	Danio rerio retinal homeobox gene 3 (rx3), mRNA [NM_131227]	-8.25895	3.56e-14
XM_001340647	Danio rerio sclerostin (sost), mRNA [XM_001340647]	-8.14359	4.88e-18
NM_001079976	Danio rerio doublesex- and mab-3-related transcription factor 2b (dmrt2b), mRNA [NM_001079976] pharyngeal arch	-7.97517	1.49e-08
NM_131150	Danio rerio POU domain gene 12 (pou12), mRNA [NM_131150]	-7.74978	4.65e-06
NM_131283	Danio rerio forkhead box B1.1 (foxb1.1), mRNA [NM_131283]	-7.70927	4.36e-06
NM_131453	Danio rerio ELAV (embryonic lethal, abnormal vision, Drosophila)-like 4 (Hu antigen D) (elavl4), mRNA [NM_131453]	-7.62379	0.000796
AW077882	fj67g02.x1 zebrafish gridded kidney Danio rerio cDNA 3' similar to contains element LTR5 repetitive element ;, mRNA sequence [AW077882]	-7.41466	1.18e-05
TC359184	Unknown	-7.28621	1.12e-05
NM_200819	Danio rerio calsenilin, presenilin binding protein, EF hand transcription factor, like (csenl), mRNA [NM_200819]	-7.26334	0.000137
NM_178100	Danio rerio oligodendrocyte lineage transcription factor 2 (olig2), mRNA [NM_178100]	-7.18691	1.52e-05
NM_001004558	Danio rerio zgc:92279 (zgc:92279), mRNA [NM_001004558]	-7.16775	1.58e-17
NM_001037574	Danio rerio zgc:122979 (zgc:122979), mRNA [NM_001037574]	-7.15633	3.6e-07
NM_001045353	Danio rerio zgc:153398 (zgc:153398), mRNA [NM_001045353]	-7.06738	1.88e-05
BC142868	Danio rerio cDNA clone IMAGE:7421679. [BC142868]	-7.02112	2.11e-05
NM_001020672	Danio rerio zgc:112277 (zgc:112277), mRNA [NM_001020672]	-6.97711	4.21e-15
CN020815	AGENCOURT_20190112 NIH_ZGC_15 Danio rerio cDNA clone IMAGE:7225479 5', mRNA sequence [CN020815]	-6.87247	5.33e-06
EH448708	FDR103-P00048-DEPE-F_A13 FDR103 Danio rerio cDNA clone FDR103-P00048-BR_A13 5', mRNA sequence [EH448708]	-6.85524	3.11e-05
ENSDART00000063779	Wu:fj19b07 protein (Fragment). [Source:Uniprot/SPTREMBL;Acc:Q6PBX7] [ENSDART00000063779]	-6.69708	1.5e-24
EB938066	9645170 ZF34 Danio rerio cDNA clone 3412999, mRNA sequence [EB938066]	-6.66743	5.1e-05
ENSDART00000081140	PREDICTED: Danio rerio hypothetical protein LOC797595 (LOC797595), partial mRNA [XM_001338028]	-6.65579	1.1e-06
TC350799	Q4REV0_TETNG (Q4REV0) Chromosome 13 SCAF15122, whole genome shotgun sequence. (Fragment), partial (7%) [TC350799]	-6.5838	6.91e-05
NM_198803	Danio rerio otopetrin 1 (otop1), mRNA [NM_198803]	-6.55066	2.42e-16
NM_131354	Danio rerio sine oculis homeobox homolog 7 (six7), mRNA [NM_131354]	-6.5023	0.000607
BC154544	Danio rerio cDNA clone MGC:172129 IMAGE:7999092, complete cds. [BC154544]	-6.3889	7.31e-05
NM_001004564	Danio rerio zgc:92925 (zgc:92925), mRNA [NM_001004564]	-6.29485	0.000126
ENSDART00000078172	HG21B (Fragment). [Source:Uniprot/SPTREMBL;Acc:Q2MGT5] [ENSDART00000078172]	-6.21381	1.94e-15
NM_001008641	Danio rerio zgc:101648 (zgc:101648), mRNA [NM_001008641]	-6.21132	0.00114
NM_001025548	Danio rerio si:dkeyp-38g8.3 (si:dkeyp-38g8.3), mRNA [NM_001025548]	-6.20147	4.58e-16
NM_205581	Danio rerio beta-thymosin (LOC402820), mRNA [NM_205581]	-6.17383	1.55e-16
CT645599	CT645599 ZF_mu Danio rerio cDNA clone ZF_mu_118h04 5', mRNA sequence [CT645599]	-6.17231	0.000212
ENSDART00000090257	fatty acid 2-hydroxylase [Source:RefSeq_peptide;Acc:NP_077282] [ENSDART00000090257]	-5.81063	0.000419
TC354279	Unknown	-5.76738	0.000582
DR726251	AGENCOURT_55089557 NIH_ZGC_7 Danio rerio cDNA clone IMAGE:7993814 5', mRNA sequence [DR726251]	-5.73492	0.000555
NM_001013280	Danio rerio zgc:113442 (zgc:113442), mRNA [NM_001013280]	-5.70258	5.85e-11
ENSDART00000032627	plasticin [Source:RefSeq_peptide;Acc:NP_571129] [ENSDART00000032627]	-5.68526	0.000129
NM_200272	Danio rerio zgc:56628 (zgc:56628), mRNA [NM_200272]	-5.68467	3.88e-06
ENSDART00000004938	PREDICTED: Danio rerio hypothetical LOC556231 (LOC556231), mRNA [XM_678984]	-5.65957	0.000556
BM573563	fx36h07.y1 Zebrafish SJD 15 day embryo Danio rerio cDNA clone IMAGE:5625469 5', mRNA sequence [BM573563]	-5.65188	3.43e-25
NM_001082940	Danio rerio v-maf musculoaponeurotic fibrosarcoma (avian) oncogene family, protein L (mafl), mRNA [NM_001082940]	-5.61472	0.000663
NM_212936	Danio rerio zgc:85889 (zgc:85889), mRNA [NM_212936]	-5.52351	0.000957
CT645160	CT645160 ZF_mu Danio rerio cDNA clone ZF_mu_133d05 3', mRNA sequence [CT645160]	-5.45319	0.000735
NM_200984	Danio rerio zgc:63595 (zgc:63595), mRNA [NM_200984]	-5.44035	2.17e-09
XM_678143	PREDICTED: Danio rerio hypothetical LOC555593 (LOC555593), mRNA [XM_678143]	-5.42774	1.19e-15
BC153888	Danio rerio cDNA clone IMAGE:7263293. [BC153888]	-5.35927	2.68e-15
EB954370	9721974 ZF35 Danio rerio cDNA clone 3426429, mRNA sequence [EB954370]	-5.22272	0.00153
NM_131318	Danio rerio distal-less homeobox gene 4b (dlx4b), mRNA [NM_131318]	-5.18117	3.04e-15
ENSDART00000050910	PREDICTED: Danio rerio hypothetical LOC555612, transcript variant 2 (LOC555612), mRNA [XM_701652]	-5.10389	0.00222
ENSDART00000077015	PREDICTED: Danio rerio hypothetical LOC555390 (LOC555390), mRNA [XM_677883]	-5.10023	1.51e-12
BE201126	fk86c01.y1 Zebrafish Research Genetics C32 fin Danio rerio cDNA 5', mRNA sequence [BE201126]	-5.09891	0.00266
BI840628	fq52h02.x1 Zebrafish adult olfactory Danio rerio cDNA clone IMAGE:4879730 3' similar to SW:ATP6_CARAU O78684 ATP SYNTHASE A CHAIN ;, mRNA sequence [BI840628]	-5.08634	0.00277
TC323780	Q9I9C8_BRARE (Q9I9C8) Sox 11a protein, partial (19%) [TC323780]	-5.03045	2.6e-06
TC363487	RATNVP3 neural visinin-like Ca2+-binding protein type 3 {Rattus norvegicus} (exp=-1; wgp=0; cg=0), partial (16%) [TC363487]	-5.0063	0.00284
XM_001344472	PREDICTED: Danio rerio similar to interferon-inducible protein Gig2 (LOC100005454), mRNA [XM_001344472]	-4.96566	0.00258
ENSDART00000059735	PREDICTED: Danio rerio similar to dopamine D1C receptor (LOC100001636), mRNA [XM_001341556]	-4.95461	0.00247
NM_131769	Danio rerio claudin j (cldnj), mRNA [NM_131769]	-4.9287	6.08e-13
CT658369	CT658369 ZF_mu Danio rerio cDNA clone ZF_mu_9d16 3', mRNA sequence [CT658369]	-4.90968	0.00368
NM_131290	Danio rerio forkhead box D3 (foxd3), mRNA [NM_131290]	-4.89448	0.00717
ENSDART00000078673	PREDICTED: Danio rerio hypothetical LOC572101 (LOC572101), mRNA [XM_695776]	-4.89243	2.83e-08
ENSDART00000063942	Checkpoint suppressor 1 (Fragment). [Source:Uniprot/SPTREMBL;Acc:Q5TYT5] [ENSDART00000063942]	-4.8443	0.00382
TC310444	Q8UUS9_BRARE (Q8UUS9) DMbeta2a, complete [TC310444]	-4.83211	0.00451
NM_131178	Danio rerio developing brain homeobox 1b (dbx1b), mRNA [NM_131178]	-4.81701	2.07e-05
NM_131286	Danio rerio SRY-box containing gene 21a (sox21a), mRNA [NM_131286]	-4.81613	6.87e-44
CN511773	AGENCOURT_22422923 NIH_ZGC_9 Danio rerio cDNA clone IMAGE:7275265 5', mRNA sequence [CN511773]	-4.80752	2.71e-05
TC311505	Unknown	-4.78733	1.96e-10
NM_213637	Danio rerio wu:fc69h09 (wu:fc69h09), mRNA [NM_213637]	-4.78034	3.51e-10
TC361044	Unknown	-4.77005	0.00548
TC321664	Unknown	-4.75725	0.00541
CN018390	AGENCOURT_20187805 NIH_ZGC_14 Danio rerio cDNA clone IMAGE:7229973 5', mRNA sequence [CN018390]	-4.74382	0.00561
ENSDART00000085661	PREDICTED: Danio rerio hypothetical protein LOC100002882 (LOC100002882), mRNA [XM_001338292]	-4.70227	0.00541
NM_199948	Danio rerio synaptotagmin IV (syt4), mRNA [NM_199948]	-4.6122	3.12e-14
ENSDART00000088852	similar to mediator of RNA polymerase II transcription, subunit 13 homolog (LOC100004024), mRNA [Source:RefSeq_dna;Acc:XR_029868] [ENSDART00000088852]	-4.61077	0.00703
XM_702261	PREDICTED: Danio rerio hypothetical LOC557451, transcript variant 2 (LOC557451), mRNA [XM_702261]	-4.60821	0.000896
ENSDART00000103077	Rab11 family-interacting protein 4 (Rab11-FIP4). [Source:Uniprot/SWISSPROT;Acc:Q86YS3] [ENSDART00000097485]	-4.59536	0.00643
NM_131676	Danio rerio proteasome (prosome, macropain) subunit, beta type, 11 (psmb11), mRNA [NM_131676]	-4.58238	0.000856
BC142937	Danio rerio cDNA clone IMAGE:8159824. [BC142937]	-4.57504	0.00778
CT596755	CT596755 ZF_mu Danio rerio cDNA clone ZF_mu_80c08 3', mRNA sequence [CT596755]	-4.51202	0.00828
ENSDART00000102870	PREDICTED: Danio rerio hypothetical LOC555544, transcript variant 1 (LOC555544), mRNA [XM_677886]	-4.50681	0.00674
NM_131605	Danio rerio fatty acid binding protein 7, brain, a (fabp7a), mRNA [NM_131605]	-4.47142	5.42e-14
TC344059	Q5C6Y2_SCHJA (Q5C6Y2) SJCHGC07590 protein (Fragment), partial (16%) [TC344059]	-4.46166	5.08e-12
TC313280	Unknown	-4.44981	4.55e-13
BC124071	Danio rerio cDNA clone IMAGE:5413295. [BC124071]	-4.44879	0.00986
ENSDART00000039663	Novel protein similar to mouse and human O-acyltransferase (Membrane bound) domain containing 2 (OACT2) (Fragment). [Source:Uniprot/SPTREMBL;Acc:Q5RG07] [ENSDART00000039663]	-4.42717	0.00919
BM316938	fw77b04.y1 Gong zebrafish testis Danio rerio cDNA clone IMAGE:5616319 5', mRNA sequence [BM316938]	-4.41419	0.0095
TC337557	Q4S7T0_TETNG (Q4S7T0) Chromosome 18 SCAF14712, whole genome shotgun sequence. (Fragment), partial (9%) [TC337557]	-4.39221	0.002
NM_001013525	Danio rerio zgc:101842 (zgc:101842), mRNA [NM_001013525]	-4.37315	3.18e-05
ENSDART00000041082	PREDICTED: Danio rerio hypothetical LOC567286 (LOC567286), mRNA [XM_690578]	-4.36533	0.00644
NM_001079988	Danio rerio zgc:158531 (zgc:158531), mRNA [NM_001079988]	-4.35635	5.49e-10
NM_131317	Danio rerio myocyte enhancer factor 2d (mef2d), mRNA [NM_131317]	-4.3364	0.00156
ENSDART00000018064	putative ISG12-2 protein [Source:RefSeq_peptide;Acc:NP_001007134] [ENSDART00000018064]	-4.3111	0.000142
NM_001004511	Danio rerio zinc finger protein 384 like (znf384l), mRNA [NM_001004511]	-4.28327	0.00602
TC359438	Unknown	-4.27541	2.82e-13
NM_200810	Danio rerio zgc:73377 (zgc:73377), mRNA [NM_200810]	-4.27174	2.91e-13
NM_001080012	Danio rerio zgc:153478 (zgc:153478), mRNA [NM_001080012]	-4.20748	1.51e-12
CK028897	AGENCOURT_16623752 NIH_ZGC_7 Danio rerio cDNA clone IMAGE:7055925 5', mRNA sequence [CK028897]	-4.1585	2.73e-07
ENSDART00000077102	similar to glutamate transporter 2B (LOC572483), mRNA [Source:RefSeq_dna;Acc:XR_029553] [ENSDART00000077102]	-4.13315	0.00242
ENSDART00000102103	hypothetical protein LOC541536 [Source:RefSeq_peptide;Acc:NP_001014372] [ENSDART00000102103]	-4.11273	5.15e-06
BC090505	Q6IYD1 (Q6IYD1) Dragon, complete [TC283145]	-4.09534	2.35e-09
CT734095	CT734095 ZF_mu Danio rerio cDNA clone ZF_mu_285d22 3', mRNA sequence [CT734095]	-4.09011	0.000767
TC354364	Unknown	-4.05248	0.00011
NM_131279	Danio rerio empty spiracles homeobox 3 (emx3), mRNA [NM_131279]	-4.03659	5.96e-35
NM_001039633	Danio rerio cadherin 10, type 2 (T2-cadherin) (cdh10), mRNA [NM_001039633]	-4.02771	0.000212
NM_001080643	Danio rerio zgc:158322 (zgc:158322), mRNA [NM_001080643]	-4.02558	1.59e-06
CA588062	STR00590 26 somite embryos Danio rerio cDNA clone CB560 5', mRNA sequence [CA588062]	-4.01971	6.77e-13
CN842320	AGENCOURT_25053585 NIH_ZGC_4 Danio rerio cDNA clone IMAGE:7287098 5', mRNA sequence [CN842320]	-4.01644	0.00218
ENSDART00000013641	Alpha-1B adrenergic receptor (Alpha 1B-adrenoceptor) (Alpha 1B- adrenoreceptor). [Source:Uniprot/SWISSPROT;Acc:P35368] [ENSDART00000013641]	-4.01606	0.000505
NM_181761	Danio rerio annexin A2a (anxa2a), mRNA [NM_181761]	-4.01438	3.64e-13
NM_001003445	Danio rerio zgc:92533 (zgc:92533), mRNA [NM_001003445]	-3.96965	4.99e-13
NM_001004539	Danio rerio zgc:92072 (zgc:92072), mRNA [NM_001004539]	-3.96899	0.00299
XM_685174	PREDICTED: Danio rerio similar to Slc16a6-prov protein (LOC561766), mRNA [XM_685174]	-3.95958	1.3e-10
ENSDART00000020282	PREDICTED: Danio rerio hypothetical protein LOC100003371 (LOC100003371), mRNA [XM_001342922]	-3.93665	0.00993
NM_001006059	Danio rerio chromogranin A (chga), mRNA [NM_001006059]	-3.93645	0.000478
NM_001080987	Danio rerio cysteine-rich, angiogenic inducer, 61 (cyr61), mRNA [NM_001080987]	-3.88411	4.46e-12
TC356743	Unknown	-3.84821	8.26e-11
ENSDART00000028610	ELAV-like protein 3 [Source:RefSeq_peptide;Acc:NP_571524] [ENSDART00000028610]	-3.84786	1.04e-32
ENSDART00000024726	AGENCOURT_21830733 NIH_ZGC_10 Danio rerio cDNA clone IMAGE:7260196 5', mRNA sequence [CN324463]	-3.83723	1.68e-05
NM_001013325	Danio rerio zgc:112967 (zgc:112967), mRNA [NM_001013325]	-3.82487	9.55e-12
TC353280	Unknown	-3.81635	7.55e-05
NM_001044911	Danio rerio neuregulin 1 (nrg1), mRNA [NM_001044911]	-3.81582	0.00566
ENSDART00000092274	Novel protein (Fragment). [Source:Uniprot/SPTREMBL;Acc:A3KQS3] [ENSDART00000092274]	-3.79711	0.000419
TC354620	Unknown	-3.78216	0.00773
NM_001017781	Danio rerio zgc:110361 (zgc:110361), mRNA [NM_001017781]	-3.76519	2.24e-10
AY880252	Danio rerio Wnt/beta-catenin target 23f-17 mRNA sequence. [AY880252]	-3.71984	6.67e-05
EH502925	FDR107-P00053-DEPE-F_O09 FDR107 Danio rerio cDNA clone FDR107-P00053-BR_O09 5', mRNA sequence [EH502925]	-3.71226	9.28e-08
NM_001013498	Danio rerio zgc:113499 (zgc:113499), mRNA [NM_001013498]	-3.7004	7.9e-22
EE689544	AGENCOURT_90083316 NIH_ZGC_29 Danio rerio cDNA clone IMAGE:8815735 5', mRNA sequence [EE689544]	-3.69287	4.53e-09
ENSDART00000083002	Q4T6A1_TETNG (Q4T6A1) Chromosome undetermined SCAF8850, whole genome shotgun sequence, partial (3%) [TC356426]	-3.6673	4.44e-11
BG738103	fp04b10.y1 zebrafish gridded kidney Danio rerio cDNA clone IMAGE:4728523 5' similar to TR:O57466 O57466 G PROTEIN COUPLED P2Y NUCLEOTIDE RECEPTOR. ;, mRNA sequence [BG738103]	-3.66396	2.65e-07
TC317982	Unknown	-3.66305	0.00568
NM_001017850	Danio rerio zgc:110159 (zgc:110159), mRNA [NM_001017850]	-3.65506	2.19e-30
TC325594	Unknown	-3.64358	0.00827
NM_001002132	Danio rerio zgc:86759 (zgc:86759), mRNA [NM_001002132]	-3.62588	2.45e-16
NM_001001842	Danio rerio cellular retinoic acid binding protein 1, like (crabp1l), mRNA [NM_001001842]	-3.6171	5.07e-12
NM_001005923	Danio rerio zgc:92905 (zgc:92905), mRNA [NM_001005923]	-3.59861	2.68e-06
XM_001337672	PREDICTED: Danio rerio hypothetical protein LOC797252 (LOC797252), mRNA [XM_001337672]	-3.59109	1.06e-11
ENSDART00000052907	hypothetical protein LOC436874 [Source:RefSeq_peptide;Acc:NP_001002601] [ENSDART00000052907]	-3.57752	0.00494
ENSDART00000087694	Novel protein (Fragment). [Source:Uniprot/SPTREMBL;Acc:Q1L8U0] [ENSDART00000087694]	-3.57064	3.03e-06
CN840757	AGENCOURT_25056377 NIH_ZGC_4 Danio rerio cDNA clone IMAGE:7287273 5', mRNA sequence [CN840757]	-3.56741	1.47e-06
EH451274	FDR103-P00055-DEPE-F_B13 FDR103 Danio rerio cDNA clone FDR103-P00055-BR_B13 5', mRNA sequence [EH451274]	-3.53037	1.3e-11
TC313080	Q3ZBV2_BOVIN (Q3ZBV2) DEAD (Asp-Glu-Ala-As) box polypeptide 19B, partial (95%) [TC313080]	-3.52163	0.00336
NM_207095	Danio rerio sine oculis homeobox homolog 1 (Drosophila) (six1), mRNA [NM_207095]	-3.51053	1.26e-28
NM_001044918	Danio rerio si:ch211-203l9.3 (si:ch211-203l9.3), mRNA [NM_001044918]	-3.50791	0.00474
TC334750	Q6GQL7_BRARE (Q6GQL7) Four and a half LIM domains a, partial (71%) [TC334750]	-3.48528	8.49e-12
NM_001003454	Danio rerio zgc:91925 (zgc:91925), mRNA [NM_001003454]	-3.47908	5.48e-05
NM_205585	Danio rerio secreted frizzled-related protein 1 (sfrp1), mRNA [NM_205585]	-3.46148	6.71e-10
NM_131872	Danio rerio vimentin (vim), mRNA [NM_131872]	-3.45846	2.65e-26
TC337426	Q5F4V5_CAEEL (Q5F4V5) Serpentine receptor, class bc (Class b-like) protein 32, partial (5%) [TC337426]	-3.4486	2.87e-08
AB032265	Danio rerio mRNA for glycogen synthase kinase 3 beta, complete cds. [AB032265]	-3.44239	0.000592
BI325077	STR00010 segmentation stage cDNA library Danio rerio cDNA clone CB8 5', mRNA sequence [BI325077]????	-3.4042	1.28e-11
ENSDART00000081657	PREDICTED: Danio rerio hypothetical LOC560602 (LOC560602), mRNA [XM_684000]	-3.40269	0.00883
CN839176	AGENCOURT_25020707 NIH_ZGC_4 Danio rerio cDNA clone IMAGE:7289838 5', mRNA sequence [CN839176]???	-3.38937	3.15e-11
BC090491	Danio rerio cDNA clone IMAGE:7137406. [BC090491]	-3.38782	4.19e-09
NM_001005580	Danio rerio zgc:92901 (zgc:92901), mRNA [NM_001005580]	-3.38397	0.00542
CT658004	CT658004 ZF_mu Danio rerio cDNA clone ZF_mu_148p19 3', mRNA sequence [CT658004]	-3.36375	6.03e-09
NM_001045303	Danio rerio zgc:136894 (zgc:136894), mRNA [NM_001045303]	-3.36301	4.72e-07
TC302023	Q7SYD4_BRARE (Q7SYD4) Zgc:63556, complete [TC302023]	-3.35166	9.21e-06
TC355273	Q6GL23_XENTR (Q6GL23) Protein phosphatase 1, regulatory (Inhibitor) subunit 3C, partial (6%) [TC355273]	-3.29343	0.00112
NM_001109872	Danio rerio zgc:173948 (zgc:173948), mRNA [NM_001109872]	-3.29191	9.99e-05
NM_001037573	Danio rerio actinin, alpha 2 (actn2), mRNA [NM_001037573]	-3.28669	5.05e-11
NM_200083	Danio rerio proenkephalin-like (penkl), mRNA [NM_200083]	-3.27742	0.00399
BC062846	Danio rerio claudin e, mRNA (cDNA clone MGC:77738 IMAGE:7000808), complete cds. [BC062846]	-3.26379	3.26e-07
XM_001335332	PREDICTED: Danio rerio hypothetical protein LOC796935 (LOC796935), mRNA [XM_001335332]	-3.24975	0.0074
NM_131358	Danio rerio Kallmann syndrome 1a sequence (kal1a), mRNA [NM_131358]	-3.23665	5.52e-09
NM_001017885	Danio rerio cholinergic receptor, nicotinic, alpha 5 (chrna5), mRNA [NM_001017885]	-3.21888	9.72e-10
NM_201152	Danio rerio transmembrane 4 superfamily member 12 (tm4sf12), mRNA [NM_201152]	-3.21523	7.03e-09
NM_131291	Danio rerio fibroblast growth factor 3 (fgf3), mRNA [NM_131291]	-3.20871	1.19e-07
XM_684402	PREDICTED: Danio rerio hypothetical LOC561004 (LOC561004), mRNA [XM_684402]	-3.20323	0.00755
ENSDART00000062802	Growth/differentiation factor 7 (Fragment). [Source:Uniprot/SPTREMBL;Acc:Q9W6C0] [ENSDART00000062802]	-3.15466	0.00895
TC340217	Unknown	-3.14919	0.00974
NM_213452	Danio rerio solute carrier family 13 (sodium-dependent dicarboxylate transporter), member 2 (slc13a2), mRNA [NM_213452]	-3.12592	1.18e-10
EB855957	7214050 KZ68 Danio rerio cDNA clone 2680168, mRNA sequence [EB855957]	-3.11341	9.46e-08
CK400158	AGENCOURT_17517254 NIH_ZGC_4 Danio rerio cDNA clone IMAGE:7120309 5', mRNA sequence [CK400158]	-3.10504	0.000904
XM_001335892	PREDICTED: Danio rerio hypothetical protein LOC795677 (LOC795677), mRNA [XM_001335892]	-3.09195	0.00132
NM_199703	Danio rerio TRAF2 and NCK interacting kinase a (tnika), mRNA [NM_199703]	-3.0877	0.00033
NM_131006	Danio rerio myogenin (myog), mRNA [NM_131006]	-3.07892	1.56e-10
BM025227	fu65g05.y1 zebrafish adult brain Danio rerio cDNA clone IMAGE:5334345 5' similar to SW:MAPA_RAT P34926 MICROTUBULE-ASSOCIATED PROTEIN 1A [CONTAINS: MAP1 LIGHT CHAIN LC2]. ;, mRNA sequence [BM025227]	-3.07678	4.35e-09
ENSDART00000099524	Type IV collagen alpha 4 chain (Fragment). [Source:Uniprot/SPTREMBL;Acc:Q4TZW9] [ENSDART00000099524]	-3.07251	0.00656
NM_001102673	Danio rerio natriuretic peptide receptor type C (npr3), mRNA [NM_001102673]	-3.06965	0.00211
NM_131717	Danio rerio sine oculis homeobox homolog 4.1 (six4.1), mRNA [NM_131717]	-3.0462	3e-10
NM_205740	Danio rerio barH-class homeodomain transcription factor (B-H2), mRNA [NM_205740]	-3.03742	2.22e-06
NM_214787	Danio rerio amiloride-sensitive cation channel 4 a (accn4a), mRNA [NM_214787]	-3.03679	5.95e-06
NM_131193	Danio rerio eyes absent homolog 1 (eya1), mRNA [NM_131193]	-3.02146	4.33e-14
NM_001024422	Danio rerio zgc:112335 (zgc:112335), mRNA [NM_001024422]	-2.98997	2.01e-21
BC076291	Danio rerio zgc:92827, mRNA (cDNA clone MGC:92827 IMAGE:7090712), complete cds. [BC076291]	-2.98423	0.000144
NM_001004618	Danio rerio zgc:103408 (zgc:103408), mRNA [NM_001004618]	-2.97284	3.33e-05
NM_001001727	Danio rerio RGM domain family, member B (rgmb), mRNA [NM_001001727]	-2.96465	3.85e-10
TC362009	Unknown	-2.94942	5.8e-06
NM_001168287	Danio rerio si:ch73-199e17.1 (si:ch73-199e17.1), mRNA [NM_001168287]	-2.94234	1.13e-07
NM_131101	Danio rerio homeo box B5a (hoxb5a), mRNA [NM_131101]	-2.91199	3.48e-21
BC045923	Danio rerio zgc:56118, mRNA (cDNA clone MGC:56118 IMAGE:5411578), complete cds. [BC045923]	-2.90537	1.41e-05
XM_691138	PREDICTED: Danio rerio similar to microtubule-associated protein tau, (LOC567833), mRNA [XM_691138]	-2.89095	1.03e-09
NM_001003558	Danio rerio tubulin, alpha 8 like 3 (tuba8l3), mRNA [NM_001003558]	-2.88904	6.46e-10
CO351640	DR_AOV_NRM04_F03 adult ovary normalized (TLL) Danio rerio cDNA, mRNA sequence [CO351640]	-2.88766	3.19e-08
BC135030	Danio rerio hypothetical LOC560591, mRNA (cDNA clone IMAGE:7142949), partial cds. [BC135030]	-2.88757	0.000105
ENSDART00000037361	Im:7138823 protein (Fragment). [Source:Uniprot/SPTREMBL;Acc:Q5BJ12] [ENSDART00000037361]	-2.87732	0.00157
ENSDART00000014062	myogenin [Source:RefSeq_peptide;Acc:NP_571081] [ENSDART00000014062]	-2.87601	7.59e-10
XM_689111	PREDICTED: Danio rerio hypothetical LOC565849 (LOC565849), mRNA [XM_689111]	-2.86914	0.000351
NM_213100	Danio rerio iroquois homeobox protein 3b (irx3b), mRNA [NM_213100]	-2.83902	2.54e-07
NM_001110469	Danio rerio quinoid dihydropteridine reductase a (qdpra), mRNA [NM_001110469]	-2.83869	2.91e-09
BC122185	Danio rerio cDNA clone IMAGE:7429367. [BC122185]	-2.83762	3.22e-06
NM_001004655	Danio rerio zgc:103748 (zgc:103748), mRNA [NM_001004655]	-2.82349	0.00522
TC348026	Q58EM1_BRARE (Q58EM1) Im:7150932 protein (Fragment), partial (33%) [TC348026]	-2.81314	3.7e-08
TC352384	Q4S113_TETNG (Q4S113) Chromosome 1 SCAF14770, whole genome shotgun sequence. (Fragment), partial (7%) [TC352384]	-2.80853	7.78e-05
ENSDART00000024722	eyes absent homolog 2 [Source:RefSeq_peptide;Acc:NP_001035382] [ENSDART00000024722]	-2.79613	0.00924
NM_001017721	Danio rerio zgc:112171 (zgc:112171), mRNA [NM_001017721]	-2.78759	2.84e-09
NM_001040242	Danio rerio uroplakin 1a (upk1a), mRNA [NM_001040242]	-2.78595	0.00856
ENSDART00000052029	naa11e05.y1 Zebrafish whole eye. Unnormalized (naa) Danio rerio cDNA clone naa11e05 5', mRNA sequence [DN857240]	-2.78595	2.37e-09
NM_001014365	Danio rerio eyes absent homolog 4 (Drosophila) (eya4), mRNA [NM_001014365]	-2.78378	8.17e-06
NM_001005596	Danio rerio ataxin 2-binding protein 1 (a2bp1), mRNA [NM_001005596]	-2.77331	1.2e-08
NM_213418	Danio rerio zgc:56560 (zgc:56560), mRNA [NM_213418]	-2.76447	1.41e-06
NM_201285	Danio rerio POU domain, class 4, transcription factor 1 (pou4f1), mRNA [NM_201285]	-2.75906	0.000206
NM_001113337	Danio rerio hypothetical LOC558396 (LOC558396), mRNA [NM_001113337]	-2.75466	1.56e-07
ENSDART00000063484	PREDICTED: Danio rerio hypothetical LOC568321 (LOC568321), mRNA [XM_691644]	-2.73075	4.15e-08
NM_198817	Danio rerio starmaker (stm), mRNA [NM_198817]	-2.72292	2.01e-15
ENSDART00000083208	Novel protein (Fragment). [Source:Uniprot/SPTREMBL;Acc:A3KPW5] [ENSDART00000083208]	-2.72289	0.00635
NM_213460	Danio rerio zgc:55556 (zgc:55556), mRNA [NM_213460]	-2.72289	1.51e-07
ENSDART00000104750	Novel protein similar to vertebrate ALL1-fused gene from chromosome 1q (AF1Q). [Source:Uniprot/SPTREMBL;Acc:A3KQS5] [ENSDART00000104750]	-2.72229	0.000802
NM_200004	Danio rerio nicotinamide nucleotide adenylyltransferase 2 (nmnat2), mRNA [NM_200004]	-2.71886	4.93e-06
NM_001013495	Danio rerio zgc:110771 (zgc:110771), mRNA [NM_001013495]	-2.71255	3.19e-09
TC338370	Unknown	-2.70674	1.31e-06
NM_001007287	Danio rerio four and a half LIM domains a (fhla), mRNA [NM_001007287]	-2.70174	6.11e-09
NM_182937	Danio rerio oncomodulin A (ocma), mRNA [NM_182937]	-2.6988	2.09e-08
CF594957	AGENCOURT_15714453 NIH_ZGC_8 Danio rerio cDNA clone IMAGE:7015250 5', mRNA sequence [CF594957]	-2.68768	1.99e-05
NM_001014317	Danio rerio zgc:113358 (zgc:113358), mRNA [NM_001014317]	-2.68555	0.0034
ENSDART00000105540	PREDICTED: Danio rerio hypothetical protein LOC100007338 (LOC100007338), mRNA [XM_001345787]	-2.68425	0.000705
NM_131895	Danio rerio glutamate receptor, ionotropic, AMPA 2.2 (gria2.2), mRNA [NM_131895]	-2.68149	0.000146
NM_153664	Danio rerio T-box 15 (tbx15), mRNA [NM_153664]	-2.67989	2.06e-05
ENSDART00000083296	similar to mKIAA0760 protein [Source:RefSeq_peptide;Acc:NP_001073499] [ENSDART00000083296]	-2.67953	0.00664
NM_001076570	Danio rerio zgc:153254 (zgc:153254), mRNA [NM_001076570]	-2.67587	1.29e-10
NM_001003518	Danio rerio zgc:100904 (zgc:100904), mRNA [NM_001003518]	-2.67195	0.000161
NM_001099427	Danio rerio small heat shock protein HSPB11 (hspb11), mRNA [NM_001099427]	-2.66817	4.16e-18
NM_001012376	Danio rerio isthmin (LOC497617), mRNA [NM_001012376]	-2.66358	3.43e-08
NM_200723	Danio rerio zgc:73126 (zgc:73126), mRNA [NM_200723]	-2.66154	9.2e-10
XM_684648	PREDICTED: Danio rerio similar to KIAA1946 (LOC561242), mRNA [XM_684648]	-2.64908	9.9e-08
NM_152952	Danio rerio cytoglobin (cygb), mRNA [NM_152952]	-2.64557	8.03e-18
NM_130973	Danio rerio chordin (chd), mRNA [NM_130973]	-2.64489	9.02e-06
NM_200592	Danio rerio nuclear receptor subfamily 2, group F, member 1, like (nr2f1l), mRNA [NM_200592]	-2.63872	4.91e-07
NM_001045087	Danio rerio otolith matrix protein (otomp), mRNA [NM_001045087]	-2.63738	1.02e-17
TC355745	Q5DBE9_SCHJA (Q5DBE9) SJCHGC01974 protein, partial (54%) [TC355745]	-2.63691	0.000151
NM_212913	Danio rerio zgc:76875 (zgc:76875), mRNA [NM_212913]	-2.63601	2.39e-08
AI882966	fc47g11.y1 Zebrafish WashU MPIMG EST Danio rerio cDNA clone IMAGE:3724580 5', mRNA sequence [AI882966]	-2.63383	0.00283
XM_001345596	PREDICTED: Danio rerio hypothetical protein LOC100007076 (LOC100007076), mRNA [XM_001345596]	-2.63322	7.61e-09
NM_001001811	Danio rerio SRY-box containing gene 3 (sox3), mRNA [NM_001001811]	-2.62907	1.3e-17
ENSDART00000058443	LOC553370 protein (Fragment). [Source:Uniprot/SPTREMBL;Acc:Q567Y1] [ENSDART00000058443]	-2.6272	8.01e-09
XM_701353	PREDICTED: Danio rerio hypothetical LOC568476 (LOC568476), mRNA [XM_701353]	-2.62468	3.36e-06
NM_205669	Danio rerio zgc:77245 (zgc:77245), mRNA [NM_205669]	-2.62009	1.72e-08
NM_170766	Danio rerio T-cell leukemia, homeobox 3b (tlx3b), mRNA [NM_170766]	-2.61855	1.87e-07
NM_205702	Danio rerio zgc:76868 (zgc:76868), mRNA [NM_205702]	-2.61824	9.75e-06
NM_001005966	Danio rerio zgc:101848 (zgc:101848), mRNA [NM_001005966]	-2.61345	0.00173
NM_130927	Danio rerio nucleoside diphosphate kinase-Z2 (ndpkz2), mRNA [NM_130927]	-2.61077	8.47e-09
NM_001002483	Danio rerio zgc:92865 (zgc:92865), mRNA [NM_001002483]	-2.60735	1.32e-08
ENSDART00000016057	Novel protein similar to vertebrate catenin (Cadherin-associated protein), alpha-like 1 (CTNNAL1) (Fragment). [Source:Uniprot/SPTREMBL;Acc:Q1LU92] [ENSDART00000016057]	-2.60562	2.66e-08
NM_131122	Danio rerio homeo box C4a (hoxc4a), mRNA [NM_131122]	-2.60065	2.97e-17
NM_131029	Danio rerio netrin 1a (ntn1a), mRNA [NM_131029]	-2.6	0.0058
TC323531	Q4SMJ2_TETNG (Q4SMJ2) Chromosome 18 SCAF14547, whole genome shotgun sequence, partial (63%) [TC323531]	-2.59502	9.74e-09
NM_001030216	Danio rerio si:dkeyp-72h1.2 (si:dkeyp-72h1.2), mRNA [NM_001030216]	-2.59444	7.79e-08
ENSDART00000067500	Hypothetical protein (Fragment). [Source:Uniprot/SPTREMBL;Acc:Q3B7Q3] [ENSDART00000067500]	-2.59121	3.19e-08
NM_131449	Danio rerio ELAV (embryonic lethal, abnormal vision, Drosophila)-like 3 (Hu antigen C) (elavl3), mRNA [NM_131449]	-2.58861	0.000365
TC325613	Unknown	-2.5857	4.9e-05
ENSDART00000050931	Novel protein similar to activated leukocyte cell adhesion molecule (Alcam) (Fragment). [Source:Uniprot/SPTREMBL;Acc:Q1LXV7] [ENSDART00000050931]	-2.56803	1.07e-07
NM_130978	Danio rerio neurogenic differentiation (neurod), mRNA [NM_130978]	-2.56097	1.4e-08
NM_131120	Danio rerio homeo box B8a (hoxb8a), mRNA [NM_131120]	-2.56019	1.58e-08
BC122112	Danio rerio cDNA clone IMAGE:7072578. [BC122112]	-2.55601	2.05e-08
NM_001005919	Danio rerio epha4a (epha4a), mRNA [NM_001005919]	-2.55082	1.1e-06
TC363465	Q7ZZT0_BRARE (Q7ZZT0) Low density lipoprotein receptor, partial (8%) [TC363465]	-2.5479	0.00709
ENSDART00000102954	PREDICTED: Danio rerio hypothetical protein LOC100003855 (LOC100003855), mRNA [XM_001343268]	-2.5387	0.00279
NM_001002690	Danio rerio zgc:91826 (zgc:91826), mRNA [NM_001002690]	-2.53776	8.71e-08
NM_198808	Danio rerio zgc:63913 (zgc:63913), mRNA [NM_198808]	-2.53537	2.49e-06
NM_001039108	Danio rerio ripply1 (ripply1), mRNA [NM_001039108]	-2.52695	2.67e-06
BC098870	Danio rerio cDNA clone IMAGE:7159761. [BC098870]	-2.52534	1.8e-07
TC339820	Q4TF23_TETNG (Q4TF23) Chromosome undetermined SCAF4905, whole genome shotgun sequence. (Fragment), partial (5%) [TC339820]	-2.52338	0.000168
ENSDART00000100253	Agouti-related protein precursor. [Source:Uniprot/SWISSPROT;Acc:O00253] [ENSDART00000100253]	-2.51856	1.83e-05
NM_001045357	Danio rerio zgc:153978 (zgc:153978), mRNA [NM_001045357]	-2.51847	0.0018
ENSDART00000029262	PREDICTED: Danio rerio hypothetical LOC556603 (LOC556603), mRNA [XM_679443]	-2.51595	2.96e-08
NM_131619	Danio rerio myosin, light polypeptide 3, skeletal muscle (mylz3), mRNA [NM_131619]	-2.51525	0.000591
NM_001020597	Danio rerio zgc:110463 (zgc:110463), mRNA [NM_001020597]	-2.51381	0.00365
ENSDART00000067461	Novel protein (Fragment). [Source:Uniprot/SPTREMBL;Acc:Q5RGY4] [ENSDART00000067461]	-2.51344	2.18e-07
NM_001013281	Danio rerio zgc:112943 (zgc:112943), mRNA [NM_001013281]	-2.51212	0.00756
ENSDART00000098876	Novel protein similar to vertebrate peptidoglycan recognition protein 1 (PGLYRP1). [Source:Uniprot/SPTREMBL;Acc:Q1LVK3] [ENSDART00000098876]	-2.508	0.000832
TC330079	Unknown	-2.50284	0.00112
NM_001040340	Danio rerio zgc:136465 (zgc:136465), mRNA [NM_001040340]	-2.49226	0.0085
TC350780	Unknown	-2.49144	2.84e-08
NM_131285	Danio rerio forkhead box B1.2 (foxb1.2), mRNA [NM_131285]	-2.49055	1.7e-07
TC328093	Q5L6A7_CHLAB (Q5L6A7) ABC transporter, ATP-binding component, partial (3%) [TC328093]	-2.47806	0.0046
NM_200005	Danio rerio vesicle-associated membrane protein 2 (vamp2), mRNA [NM_200005]	-2.47699	1.08e-15
TC332518	Q6DGP8_BRARE (Q6DGP8) Neuritin 1, complete [TC332518]	-2.47027	6.62e-06
TC307124	Q6P0C7_BRARE (Q6P0C7) Secretory carrier membrane protein 5, complete [TC307124]	-2.46117	9.2e-08
NM_001098257	Danio rerio insulin-like growth factor binding protein-1b (LOC793907), mRNA [NM_001098257]	-2.46096	4.4e-07
NM_131425	Danio rerio ETS-domain transcription factor pea3 (pea3), mRNA [NM_131425]	-2.45716	3.96e-08
EH585008	FDR306-P00018-DEPE-F_P17 FDR306 Danio rerio cDNA clone FDR306-P00018-BR_P17 5', mRNA sequence [EH585008]	-2.45494	4.76e-08
NM_001025494	Danio rerio zgc:158123 (zgc:158123), mRNA [NM_001025494]	-2.45097	0.00102
NM_001100441	Danio rerio zgc:165621 (zgc:165621), mRNA [NM_001100441]	-2.44862	0.000161
NM_201490	Danio rerio N-ethylmaleimide-sensitive factor (nsf), mRNA [NM_201490]	-2.448	2.51e-15
NM_131435	Danio rerio synaptosome-associated protein 25a (snap25a), mRNA [NM_131435]	-2.4447	1.2e-06
ENSDART00000045618	Type IV collagen alpha 3 chain (Fragment). [Source:Uniprot/SPTREMBL;Acc:Q58FS7] [ENSDART00000045618]	-2.44249	0.000285
ENSDART00000087862	Novel protein similar to vertebrate collagen family (Fragment). [Source:Uniprot/SPTREMBL;Acc:Q1LYN6] [ENSDART00000087862]	-2.44177	5.53e-05
NM_001008593	Danio rerio zgc:101847 (zgc:101847), mRNA [NM_001008593]	-2.44065	0.000344
NM_131457	Danio rerio bone morphogenetic protein receptor, type 1b (bmpr1b), mRNA [NM_131457]	-2.43872	3.55e-07
NM_001045459	Danio rerio zgc:153120 (zgc:153120), mRNA [NM_001045459]	-2.43532	0.000421
NM_001024222	Danio rerio zgc:110132 (zgc:110132), mRNA [NM_001024222]	-2.43496	3.66e-15
ENSDART00000104907	PREDICTED: Danio rerio hypothetical protein LOC100005955 (LOC100005955), mRNA [XM_001344813]	-2.42623	7.5e-08
NM_001013511	Danio rerio zgc:110761 (zgc:110761), mRNA [NM_001013511]	-2.42052	5.57e-15
EH451159	FDR103-P00054-DEPE-F_M09 FDR103 Danio rerio cDNA clone FDR103-P00054-BR_M09 5', mRNA sequence [EH451159]	-2.40925	4.74e-06
TC348383	BC047583 SMOC2 protein {Homo sapiens} (exp=-1; wgp=0; cg=0), partial (44%) [TC348383]	-2.40843	3.69e-07
TC363378	RBS_CUCSA (P08474) Ribulose bisphosphate carboxylase small chain, chloroplast precursor (RuBisCO small subunit) , partial (5%) [TC363378]	-2.40731	1.27e-07
TC338265	Q7R641_GIALA (Q7R641) GLP_574_180933_182105, partial (7%) [TC319650]	-2.4023	0.000736
NM_001113659	Danio rerio hypothetical protein LOC100006523 (LOC100006523), mRNA [NM_001113659]	-2.39585	2.65e-05
NM_212795	Danio rerio dead end (dnd), mRNA [NM_212795]	-2.39035	0.00453
NM_131090	Danio rerio hairy-related 4 (her4), mRNA [NM_131090]	-2.3863	0.000355
TC329607	Unknown	-2.38461	0.00887
ENSDART00000057022	Kbtbd5 protein (Fragment). [Source:Uniprot/SPTREMBL;Acc:Q66L56] [ENSDART00000057022]	-2.38357	7.02e-05
NM_131217	Danio rerio retinoid x receptor, alpha (rxra), mRNA [NM_131217]	-2.3827	4.29e-07
CN838774	AGENCOURT_25023101 NIH_ZGC_4 Danio rerio cDNA clone IMAGE:7290443 5', mRNA sequence [CN838774]	-2.38257	0.000188
CK359992	AGENCOURT_17116032 NIH_ZGC_4 Danio rerio cDNA clone IMAGE:7088043 5', mRNA sequence [CK359992]	-2.38145	0.00428
NM_001079963	Danio rerio vascular endothelial zinc finger 1 (vezf1), mRNA [NM_001079963]	-2.37813	4.65e-05
NM_001017771	Danio rerio zgc:112437 (zgc:112437), mRNA [NM_001017771]	-2.37581	3.6e-06
ENSDART00000082046	Ntf3 protein (Fragment). [Source:Uniprot/SPTREMBL;Acc:Q568T2] [ENSDART00000082046]	-2.37332	2.13e-05
NM_200969	Danio rerio zgc:66343 (zgc:66343), mRNA [NM_200969]	-2.36957	0.000794
NM_001005774	Danio rerio zgc:101070 (zgc:101070), mRNA [NM_001005774]	-2.36682	1.84e-07
NM_001045470	Danio rerio zgc:153007 (zgc:153007), mRNA [NM_001045470]	-2.36646	2.64e-05
ENSDART00000103505	RNA binding motif protein 19 [Source:RefSeq_peptide;Acc:NP_944597] [ENSDART00000103505]	-2.36466	2.44e-05
ENSDART00000086340	hypothetical protein LOC561654 [Source:RefSeq_peptide;Acc:NP_001070038] [ENSDART00000086340]	-2.36297	1.33e-06
NM_214777	Danio rerio zgc:91787 (zgc:91787), mRNA [NM_214777]	-2.36229	4.57e-07
NM_001003477	Danio rerio zgc:91839 (zgc:91839), mRNA [NM_001003477]	-2.35864	1e-08
NM_001102573	Danio rerio connective tissue growth factor (ctgf), mRNA [NM_001102573]	-2.35436	0.000125
TC350754	Unknown	-2.35089	1.67e-06
BC091845	Danio rerio im:7150932, mRNA (cDNA clone IMAGE:7150932), partial cds. [BC091845]	-2.34957	1.06e-06
AI545002	fb73e01.x1 Zebrafish WashU MPIMG EST Danio rerio cDNA clone IMAGE:3717528 3', mRNA sequence [AI545002]	-2.34638	0.00108
NM_212666	Danio rerio cytochrome P450, family 26, subfamily b, polypeptide 1 (cyp26b1), mRNA [NM_212666]	-2.34387	4.35e-09
NM_131537	Danio rerio homeo box B5b (hoxb5b), mRNA [NM_131537]	-2.3417	5.45e-14
BC154804	Danio rerio cDNA clone IMAGE:7152478. [BC154804]	-2.34051	2e-07
NM_131362	Danio rerio sine oculis homeobox homolog 3a (six3a), mRNA [NM_131362]	-2.33793	0.000632
NM_200955	Danio rerio basic helix-loop-helix domain containing, class B, 5 (bhlhb5), mRNA [NM_200955]	-2.33743	0.00231
NM_001040319	Danio rerio zgc:136242 (zgc:136242), mRNA [NM_001040319]	-2.3198	0.00934
CN842562	AGENCOURT_25022468 NIH_ZGC_4 Danio rerio cDNA clone IMAGE:7288748 5', mRNA sequence [CN842562]	-2.31833	0.000242
TC361512	Unknown	-2.31822	0.00105
NM_001045203	Danio rerio similar to Oxr1 protein (LOC570476), mRNA [NM_001045203]	-2.31359	0.00111
ENSDART00000079215	stanniocalcin 2 [Source:RefSeq_peptide;Acc:NP_001014827] [ENSDART00000079215]	-2.31339	1.65e-06
NM_001005392	Danio rerio Down syndrome critical region gene 1-like 2 (dscr1l2), mRNA [NM_001005392]	-2.30345	0.00236
NM_001044321	Danio rerio peptidoglycan recognition protein 5 (pglyrp5), mRNA [NM_001044321]	-2.30258	2.3e-05
NM_001013563	Danio rerio zgc:113637 (zgc:113637), mRNA [NM_001013563]	-2.30202	3.09e-07
ENSDART00000097770	Novel protein. [Source:Uniprot/SPTREMBL;Acc:A2BFQ0] [ENSDART00000097770]	-2.30201	0.00738
TC333977	BC046046 zgc:73136 protein {Danio rerio} (exp=-1; wgp=0; cg=0), partial (57%) [TC333977]	-2.29804	0.00351
NM_001002396	Danio rerio zgc:92710 (zgc:92710), mRNA [NM_001002396]	-2.28733	1.92e-06
CT612793	CT612793 ZF_mu Danio rerio cDNA clone ZF_mu_53m16 3', mRNA sequence [CT612793]	-2.28543	0.00382
ENSDART00000064977	Novel keratin family protein. [Source:Uniprot/SPTREMBL;Acc:Q1LXV4] [ENSDART00000064977]	-2.27928	3e-07
NM_001045355	Danio rerio zgc:153362 (zgc:153362), mRNA [NM_001045355]	-2.27906	0.000844
ENSDART00000079655	si:ch211-146m5.2 (si:ch211-146m5.2), misc RNA [Source:RefSeq_dna;Acc:XR_029637] [ENSDART00000079655]	-2.27561	3.71e-07
NM_131102	Danio rerio POU domain gene 1 (pou1), mRNA [NM_131102]	-2.27227	1.11e-06
ENSDART00000103453	alkaline phosphatase [Source:RefSeq_peptide;Acc:NP_957301] [ENSDART00000103453]	-2.27217	0.00539
ENSDART00000027829	Novel protein similar to vertebrate Rab6-interacting protein 2 (RAB6IP2) (Fragment). [Source:Uniprot/SPTREMBL;Acc:Q5RH12] [ENSDART00000027829]	-2.27123	7.14e-07
NM_001009904	Danio rerio zgc:92332 (zgc:92332), mRNA [NM_001009904]	-2.27048	5.4e-07
TC314375	Q6KC13_BRARE (Q6KC13) Alpha-2,8-sialyltransferase ST8Sia I (Fragment) , complete [TC314375]	-2.26498	0.000533
ENSDART00000105802	PREDICTED: Danio rerio similar to Wnt3 (LOC569420), mRNA [XM_692803]	-2.25976	2.45e-06
NM_001013341	Danio rerio tyrosine 3-monooxygenase/tryptophan 5-monooxygenase activation protein, epsilon polypeptide 2 (ywhae2), mRNA [NM_001013341]	-2.25264	0.0014
NM_131834	Danio rerio chemokine (C-X-C motif), receptor 4b (cxcr4b), mRNA [NM_131834]	-2.25252	3.83e-07
NM_131604	Danio rerio runt-related transcription factor 3 (runx3), mRNA [NM_131604]	-2.24498	3.16e-06
NM_207184	Danio rerio iroquois homeobox protein 1, a (irx1a), mRNA [NM_207184]	-2.24225	9.53e-13
ENSDART00000104559	Unknown	-2.22975	0.000216
ENSDART00000101584	Novel protein (Fragment). [Source:Uniprot/SPTREMBL;Acc:Q1LYN7] [ENSDART00000101584]	-2.22203	5.41e-07
BC155561	Danio rerio cDNA clone IMAGE:2641933, partial cds. [BC155561]	-2.22166	0.00795
CT698143	CT698143 ZF_mu Danio rerio cDNA clone ZF_mu_171c12 3', mRNA sequence [CT698143]	-2.22115	2.73e-05
TC356295	Unknown	-2.21949	0.00192
TC358052	Unknown	-2.2175	0.00432
NM_001030205	Danio rerio activating transcription factor 7a (atf7a), mRNA [NM_001030205]	-2.21492	0.00176
NM_001030072	Danio rerio zgc:113456 (zgc:113456), mRNA [NM_001030072]	-2.21457	1.17e-06
NM_131863	Danio rerio jagged 1b (jag1b), mRNA [NM_131863]	-2.20858	2.5e-12
TC357642	Q4RA06_TETNG (Q4RA06) Chromosome undetermined SCAF24723, whole genome shotgun sequence. (Fragment), partial (27%) [TC357642]	-2.20808	1.59e-05
NM_001017857	Danio rerio zgc:110140 (zgc:110140), mRNA [NM_001017857]	-2.20759	1.97e-06
NM_001005958	Danio rerio zgc:101895 (zgc:101895), mRNA [NM_001005958]	-2.20531	3.3e-06
NM_001080189	Danio rerio zgc:158328 (zgc:158328), mRNA [NM_001080189]	-2.20445	8.04e-06
NM_200695	Danio rerio zgc:73056 (zgc:73056), mRNA [NM_200695]	-2.20255	0.00353
ENSDART00000060715	Cyp2b10 protein (Fragment). [Source:Uniprot/SPTREMBL;Acc:Q5EAQ5] [ENSDART00000060715]	-2.19708	0.00646
NM_152955	Danio rerio dachshund a (dacha), mRNA [NM_152955]	-2.19337	7.98e-07
BC091934	Danio rerio cDNA clone IMAGE:7143418. [BC091934]	-2.19134	7.61e-07
TC358174	Q4TFN0_TETNG (Q4TFN0) Chromosome undetermined SCAF4361, whole genome shotgun sequence, partial (19%) [TC358174]	-2.1891	9.96e-07
ENSDART00000079295	Novel protein similar to vertebrate dynactin 1 (P150, glued homolog, Drosophila) (DCTN1) (Fragment). [Source:Uniprot/SPTREMBL;Acc:Q1L8W3] [ENSDART00000079295]	-2.18909	0.00132
NM_131806	Danio rerio ephrin B3 (efnb3), mRNA [NM_131806]	-2.18779	5.11e-05
NM_001030285	Danio rerio ezrin (ezr), mRNA [NM_001030285]	-2.18686	1.83e-06
TC349459	Q4S0I3_TETNG (Q4S0I3) Chromosome 2 SCAF14781, whole genome shotgun sequence, partial (30%) [TC349459]	-2.17975	2.93e-05
NM_001083839	Danio rerio hypothetical LOC564754 (MGC162648), mRNA [NM_001083839]	-2.17968	4.5e-06
TC350948	Unknown	-2.1788	3.25e-06
TC341231	Q4T2V9_TETNG (Q4T2V9) Chromosome 21 SCAF10164, whole genome shotgun sequence. (Fragment), partial (13%) [TC341231]	-2.17272	1.77e-06
CT660169	CT660169 ZF_mu Danio rerio cDNA clone ZF_mu_2a02 3', mRNA sequence [CT660169]	-2.16676	0.00392
NM_001003848	Danio rerio enolase 2 (eno2), mRNA [NM_001003848]	-2.16376	1.17e-05
NM_001007124	Danio rerio met proto-oncogene (hepatocyte growth factor receptor) (met), mRNA [NM_001007124]	-2.16354	0.00658
NM_001004641	Danio rerio zgc:101565 (zgc:101565), mRNA [NM_001004641]	-2.16327	1.11e-06
NM_001002739	Danio rerio zgc:100980 (zgc:100980), mRNA [NM_001002739]	-2.15947	0.00459
ENSDART00000066620	hypothetical protein LOC678528 [Source:RefSeq_peptide;Acc:NP_001035343] [ENSDART00000066620]	-2.15359	0.000337
NM_130954	Danio rerio deltaA (dla), mRNA [NM_130954]	-2.15016	8.78e-06
NM_173276	Danio rerio laminin, beta 4 (lamb4), mRNA [NM_173276]	-2.14987	1.35e-06
DQ012169	Danio rerio cypher/ZASP splice variant 3 gamma mRNA, complete cds, alternatively spliced. [DQ012169]	-2.1481	0.000271
NM_212761	Danio rerio ictacalcin (icn), mRNA [NM_212761]	-2.14702	1.28e-06
ENSDART00000103383	E74-like factor 2 (ets domain transcription factor) [Source:RefSeq_peptide;Acc:NP_954689] [ENSDART00000103383]	-2.14475	3.91e-06
NM_199573	Danio rerio zgc:66326 (zgc:66326), mRNA [NM_199573]	-2.13723	1.9e-11
NM_214747	Danio rerio zgc:85816 (zgc:85816), mRNA [NM_214747]	-2.13616	3.78e-06
NM_001002496	Danio rerio zgc:100854 (zgc:100854), mRNA [NM_001002496]	-2.13302	7.73e-05
NM_131142	Danio rerio homeo box B1b (hoxb1b), mRNA [NM_131142]	-2.12783	2.49e-11
TC335773	Unknown	-2.12777	3.71e-06
NM_130958	Danio rerio deltaB (dlb), mRNA [NM_130958]	-2.12608	2.61e-11
TC336621	Q4RVQ3_TETNG (Q4RVQ3) Chromosome 9 SCAF14991, whole genome shotgun sequence. (Fragment), partial (5%) [TC336621]	-2.12509	0.004
CT729417	CT729417 ZF_mu Danio rerio cDNA clone ZF_mu_237m09 5', mRNA sequence [CT729417]	-2.12254	0.00428
TC337014	Q4SKQ6_TETNG (Q4SKQ6) Chromosome undetermined SCAF14565, whole genome shotgun sequence. (Fragment), partial (30%) [TC337014]	-2.12098	4.05e-05
TC351695	Q6P603_BRARE (Q6P603) Annexin A2a, partial (33%) [TC351695]	-2.12096	0.000493
XM_001335904	PREDICTED: Danio rerio hypothetical protein LOC795691 (LOC795691), mRNA [XM_001335904]	-2.12034	0.00299
NM_001080035	Danio rerio zgc:158429 (zgc:158429), mRNA [NM_001080035]	-2.11811	0.00996
EH513206	FDR107-P00010-DEPE-R_B06 FDR107 Danio rerio cDNA clone FDR107-P00010-BR_B06 3', mRNA sequence [EH513206]	-2.11459	0.00593
TC333922	Unknown	-2.11199	6.77e-05
ENSDART00000098294	Novel protein similar to vertebrate ADAM metallopeptidase with thrombospondin type 1 motif, 15 (ADAMTS15). [Source:Uniprot/SPTREMBL;Acc:A2BIA3] [ENSDART00000098294]	-2.11163	0.000551
NM_200410	Danio rerio zgc:64089 (zgc:64089), mRNA [NM_200410]	-2.11045	0.00087
NM_001025168	Danio rerio LIM homeobox transcription factor 1, beta 2 (lmx1b.2), mRNA [NM_001025168]	-2.10837	0.000524
NM_001077519	Danio rerio pleckstrin homology domain containing, family H, member 1 (max1), mRNA [NM_001077519]	-2.10638	2.3e-06
ENSDART00000009277	hypothetical protein LOC641561 [Source:RefSeq_peptide;Acc:NP_001032649] [ENSDART00000009277]	-2.1063	2.1e-06
BC124696	Danio rerio cDNA clone IMAGE:7290186. [BC124696]	-2.09613	1.14e-05
NM_183340	Danio rerio tumor protein p73 (tp73), mRNA [NM_183340]	-2.09342	0.000286
XM_689740	PREDICTED: Danio rerio similar to TGF-beta=transforming growth factor beta [XM_689740]	-2.08384	0.00129
NM_001003535	Danio rerio zgc:100857 (zgc:100857), mRNA [NM_001003535]	-2.08237	3.96e-06
XM_692734	PREDICTED: Danio rerio similar to bromodomain containing 2 (LOC569354), mRNA [XM_692734]	-2.08048	5.65e-05
ENSDART00000015991	interleukin 1, beta [Source:RefSeq_peptide;Acc:NP_998009] [ENSDART00000015991]	-2.06878	0.000374
NM_001077372	Danio rerio zgc:153639 (zgc:153639), mRNA [NM_001077372]	-2.06685	0.00885
TC363420	Q6P122_BRARE (Q6P122) Dynamin 2, partial (5%) [TC363420]	-2.06533	0.00431
NM_001006079	Danio rerio odd-skipped related 1 (Drosophila) (osr1), mRNA [NM_001006079]	-2.06013	3.93e-06
TC316113	Q6UDM5_BRARE (Q6UDM5) Starmaker, partial (28%) [TC316113]	-2.05797	4.01e-06
TC353676	Q802Z9_BRARE (Q802Z9) PAI-1 mRNA-binding protein, partial (63%) [TC353676]	-2.05632	3.85e-06
NM_001008592	Danio rerio zgc:101853 (zgc:101853), mRNA [NM_001008592]	-2.05428	7.09e-06
ENSDART00000102480	hypothetical protein LOC445092 [Source:RefSeq_peptide;Acc:NP_001003486] [ENSDART00000102480]	-2.05315	0.000289
NM_001080701	Danio rerio zgc:158324 (zgc:158324), mRNA [NM_001080701]	-2.05231	0.000334
NM_001002664	Danio rerio zgc:91960 (zgc:91960), mRNA [NM_001002664]	-2.05184	0.000162
TC336086	Unknown	-2.0517	4.97e-06
TC326841	Unknown	-2.05043	0.00277
NM_131765	Danio rerio claudin e (cldne), mRNA [NM_131765]	-2.0501	2.22e-10
ENSDART00000104299	Q90306_CARAU (Q90306) G-RICH, partial (89%) [TC313783]	-2.04938	5.05e-06
XM_700949	PREDICTED: Danio rerio hypothetical LOC561824 (LOC561824), mRNA [XM_700949]	-2.04781	2.37e-10
AY555034	Danio rerio reticulon 1-a1 (rtn1) mRNA, complete cds, alternatively spliced. [AY555034]	-2.04553	2.47e-05
CA975275	AGENCOURT_11282082 NCI_CGAP_ZEmb2 Danio rerio cDNA clone IMAGE:6802754 5', mRNA sequence [CA975275]	-2.04481	0.00845
CA787384	AGENCOURT_11031344 NCI_CGAP_ZKid1 Danio rerio cDNA clone IMAGE:6805699 5', mRNA sequence [CA787384]	-2.04253	0.000636
NM_001045245	Danio rerio zgc:136369 (zgc:136369), mRNA [NM_001045245]	-2.04242	1.41e-05
ENSDART00000044432	Im:7150932 protein (Fragment). [Source:Uniprot/SPTREMBL;Acc:Q58EM1] [ENSDART00000044432]	-2.04158	8.49e-06
NM_001020780	Danio rerio Unc4.1 homeobox (C. elegans) (uncx4.1), mRNA [NM_001020780]	-2.04031	8.28e-06
ENSDART00000076831	PREDICTED: Danio rerio hypothetical protein LOC100008033 (LOC100008033), mRNA [XM_001346313]	-2.03797	0.000157
NM_200568	Danio rerio zgc:77517 (zgc:77517), mRNA [NM_200568]	-2.03524	8.38e-06
XM_691233	PREDICTED: Danio rerio hypothetical LOC567919 (LOC567919), mRNA [XM_691233]	-2.03177	1.15e-05
NM_131881	Danio rerio iroquois homeobox protein 7 (irx7), mRNA [NM_131881]	-2.03048	5.33e-06
TC349401	Unknown	-2.02533	0.00597
ENSDART00000099507	Novel protein similar to human talin 2 (TLN2) (Fragment). [Source:Uniprot/SPTREMBL;Acc:Q5SPK7] [ENSDART00000099507]	-2.02344	6.25e-06
TC361054	Q4SU07_TETNG (Q4SU07) Chromosome 18 SCAF14048, whole genome shotgun sequence. (Fragment), partial (21%) [TC361054]	-2.02042	0.000384
CN175416	AGENCOURT_21029434 NIH_ZGC_8 Danio rerio cDNA clone IMAGE:7242878 5', mRNA sequence [CN175416]	-2.01935	1.27e-05
ENSDART00000077178	Tenascin-W precursor. [Source:Uniprot/SPTREMBL;Acc:O57587] [ENSDART00000077178]	-2.0192	2.31e-09
ENSDART00000101076	Unknown	-2.01819	0.000241
XM_001346256	PREDICTED: Danio rerio similar to Apoptotic chromatin condensation inducer in the nucleus (Acinus) (LOC567929), mRNA [XM_001346256]	-2.01768	6.71e-06
NM_213337	Danio rerio zgc:63977 (zgc:63977), mRNA [NM_213337]	-2.01724	0.00167
EH548940	FDR202-P00036-DEPE-F_B08 FDR202 Danio rerio cDNA clone FDR202-P00036-BR_B08 5', mRNA sequence [EH548940]	-2.01492	0.0036
NM_212865	Danio rerio RNA binding motif protein 24 (rbm24), mRNA [NM_212865]	-2.01315	0.00985
TC314511	Q640W8_XENLA (Q640W8) MGC84401 protein, partial (15%) [TC314511]	-2.01204	0.000351
NM_152964	Danio rerio gastrulation brain homeo box 2 (gbx2), mRNA [NM_152964]	-2.01108	8.05e-06
TC336132	Unknown	-2.01065	0.00326
ENSDART00000060847	Unknown	-2.00769	1.61e-05
DY551439	AGENCOURT_69885474 NIH_ZGC_25 Danio rerio cDNA clone IMAGE:8335204 5', mRNA sequence [DY551439]	-2.0059	0.000813
NM_001017719	Danio rerio zgc:112175 (zgc:112175), mRNA [NM_001017719]	-2.00023	0.00441
BC076069	Danio rerio paired box gene 3, mRNA (cDNA clone MGC:92547 IMAGE:7090716), complete cds. [BC076069]	2.00127	8.67e-10
NM_001079950	Danio rerio zgc:158237 (zgc:158237), mRNA [NM_001079950]	2.0037	8.66e-06
NM_194370	Danio rerio ankylosis, progressive homolog (ankh), mRNA [NM_194370]	2.00522	7.61e-06
NM_001002561	Danio rerio zgc:92762 (zgc:92762), mRNA [NM_001002561]	2.00548	8.9e-06
NM_001042686	Danio rerio heat shock protein 12B (hspa12b), mRNA [NM_001042686]	2.00773	7.43e-06
TC347514	AAD32866.1, partial (14%) [TC347514]	2.00906	1.8e-05
TC350033	Unknown	2.01029	1.08e-05
TC326766	Unknown	2.01668	6.15e-05
NM_001099994	Danio rerio clusterin-like (LOC559018), mRNA [NM_001099994]	2.01708	0.00318
NM_001105523	Danio rerio zinc finger protein (LOC562505), mRNA [NM_001105523]	2.01759	0.00698
XM_686367	PREDICTED: Danio rerio hypothetical LOC563003 (LOC563003), mRNA [XM_686367]	2.01899	0.000231
NM_200762	Danio rerio GTP cyclohydrolase I feedback regulator (gchfr), mRNA [NM_200762]	2.02515	1.11e-05
TC335042	Q6PBN6_BRARE (Q6PBN6) Inositol hexaphosphate kinase 2, complete [TC335042]	2.02548	5.65e-06
XR_029969	PREDICTED: Danio rerio hypothetical protein LOC100005591 (LOC100005591), mRNA [XR_029969]	2.02821	1.22e-05
NM_001080988	Danio rerio zgc:158411 (zgc:158411), mRNA [NM_001080988]	2.02881	9.5e-06
NM_001089404	Danio rerio similar to CCCH zinc finger protein C3H-1 (LOC564559), mRNA [NM_001089404]	2.02943	3.96e-10
CT727093	CT727093 ZF_mu Danio rerio cDNA clone ZF_mu_238m22 5', mRNA sequence [CT727093]	2.03083	1.59e-05
NM_212770	Danio rerio carboxypeptidase N, polypeptide 1 (cpn1), mRNA [NM_212770]	2.03167	5.68e-06
TC339647	Q26195_PLAVI (Q26195) Pva1 protein, partial (9%) [TC339647]	2.03632	5.85e-05
NM_001012481	Danio rerio wu:fj29g05 (wu:fj29g05), mRNA [NM_001012481]	2.03654	0.000133
CT610379	CT610379 ZF_mu Danio rerio cDNA clone ZF_mu_173o17 3', mRNA sequence [CT610379]	2.03664	6.29e-06
ENSDART00000105993	Novel protein (Fragment). [Source:Uniprot/SPTREMBL;Acc:A3KQR2] [ENSDART00000105993]	2.03799	0.00148
NM_001002139	Danio rerio ribosomal protein L11 (rpl11), mRNA [NM_001002139]	2.03844	4.79e-06
EH533862	FDR107-P00066-DEPE-R_P09 FDR107 Danio rerio cDNA clone FDR107-P00066-BR_P09 3', mRNA sequence [EH533862]	2.03923	0.00594
TC338666	Unknown	2.04042	4.88e-06
NM_207637	Danio rerio adrenergic, alpha-2A-, receptor (adra2a), mRNA [NM_207637]	2.04116	8.8e-05
NM_001045283	Danio rerio zgc:136271 (zgc:136271), mRNA [NM_001045283]	2.04199	0.00103
CT665193	CT665193 ZF_mu Danio rerio cDNA clone ZF_mu_142h03 3', mRNA sequence [CT665193]	2.04241	0.000254
NM_001004113	Danio rerio zgc:91997 (zgc:91997), mRNA [NM_001004113]	2.04293	0.00407
ENSDART00000100216	Unknown	2.04418	0.00241
TC359003	Q4REV0_TETNG (Q4REV0) Chromosome 13 SCAF15122, whole genome shotgun sequence. (Fragment), partial (9%) [TC359003]	2.04501	5.96e-06
CT609303	CT609303 ZF_mu Danio rerio cDNA clone ZF_mu_180f08 5', mRNA sequence [CT609303]	2.04618	0.00181
BC151911	Danio rerio cDNA clone IMAGE:7441397. [BC151911]	2.04658	0.00546
NM_200803	Danio rerio zgc:73355 (zgc:73355), mRNA [NM_200803]	2.04755	1.63e-05
BC052106	Danio rerio cDNA clone IMAGE:5605247, partial cds. [BC052106]	2.04846	0.000124
TC352844	Q32PT7_BRARE (Q32PT7) Zgc:123090 protein, partial (21%) [TC352844]	2.04895	6.48e-06
DT064885	AGENCOURT_56168918 NIH_ZGC_7 Danio rerio cDNA clone IMAGE:7999244 5', mRNA sequence [DT064885]	2.04908	1.84e-05
NM_200614	Danio rerio zgc:63663 (zgc:63663), mRNA [NM_200614]	2.05637	0.000538
ENSDART00000039350	PREDICTED: Danio rerio similar to RAC [XM_692957]	2.05922	3.92e-06
CT689681	CT689681 ZF_mu Danio rerio cDNA clone ZF_mu_189n02 5', mRNA sequence [CT689681]	2.06086	4e-06
CK360741	AGENCOURT_17113518 NIH_ZGC_4 Danio rerio cDNA clone IMAGE:7090670 5', mRNA sequence [CK360741]	2.06138	0.00133
NM_001099244	Danio rerio lysyl oxidase-like 2a (loxl2a), mRNA [NM_001099244]	2.06363	0.000673
NM_001080029	Danio rerio zgc:136956 (zgc:136956), mRNA [NM_001080029]	2.06388	4.94e-06
CT612943	CT612943 ZF_mu Danio rerio cDNA clone ZF_mu_75m09 5', mRNA sequence [CT612943]	2.06556	4.36e-06
NM_152967	Danio rerio inhibitor of DNA binding 3 (id3), mRNA [NM_152967]	2.06682	3.38e-06
CT687979	CT687979 ZF_mu Danio rerio cDNA clone ZF_mu_230n06 5', mRNA sequence [CT687979]	2.06748	3.56e-05
NM_001017634	Danio rerio zgc:110237 (zgc:110237), mRNA [NM_001017634]	2.07039	0.00848
NM_131622	Danio rerio hairy/enhancer-of-split related with YRPW motif 2 (hey2), mRNA [NM_131622]	2.07099	5.04e-05
ENSDART00000091044	Hypothetical protein (Fragment). [Source:Uniprot/SPTREMBL;Acc:Q0P4B5] [ENSDART00000091044]	2.07601	0.000427
XM_001337660	PREDICTED: Danio rerio hypothetical protein LOC797240 (LOC797240), mRNA [XM_001337660]	2.07851	0.00984
NM_152884	Danio rerio caspase b (caspb), mRNA [NM_152884]	2.08302	0.00011
CT608752	CT608752 ZF_mu Danio rerio cDNA clone ZF_mu_179j15 3', mRNA sequence [CT608752]	2.08446	2.2e-05
BC122120	Danio rerio cDNA clone IMAGE:7090410. [BC122120]	2.08492	3.89e-06
NM_001004549	Danio rerio zgc:92102 (zgc:92102), mRNA [NM_001004549]	2.08606	5.53e-06
NM_131705	Danio rerio major histocompatibility complex class I UEA gene (mhc1uea), mRNA [NM_131705]	2.08751	0.00485
NM_131525	Danio rerio spectrin, beta, erythrocytic (sptb), mRNA [NM_131525]	2.09485	2.48e-06
AW165276	fe06h09.x1 Zebrafish WashU MPIMG EST Danio rerio cDNA clone IMAGE:3738113 3', mRNA sequence [AW165276]	2.09496	0.00036
TC319744	Q4RVA8_TETNG (Q4RVA8) Chromosome 15 SCAF14992, whole genome shotgun sequence, partial (5%) [TC319744]	2.09506	0.000888
TC345973	Q21TM3_9BURK (Q21TM3) Inner-membrane translocator precursor, partial (5%) [TC345973]	2.09821	0.000356
ENSDART00000067513	Danio rerio cDNA clone IMAGE:5604321, partial cds. [BC054690]	2.099	5.61e-11
NM_001080750	Danio rerio SRY (sex determining region Y)-box 7 (sox7), mRNA [NM_001080750]	2.09923	5.58e-11
ENSDART00000066032	Probable ubiquitin-conjugating enzyme E2 W (EC 6.3.2.19) (Ubiquitin- protein ligase W) (Ubiquitin carrier protein W). [Source:Uniprot/SWISSPROT;Acc:Q4VBH4] [ENSDART00000066032]	2.10202	0.00492
NM_001083570	Danio rerio similar to Mig-6=mitogen-inducible gene mig-6 product (MGC162129), mRNA [NM_001083570]	2.1023	4.84e-05
AW018992	fd58a11.x1 Zebrafish WashU MPIMG EST Danio rerio cDNA clone IMAGE:3733916 3', mRNA sequence [AW018992]	2.10317	0.00449
DN903446	naq48f08.y1 Zebrafish retina. Unnormalized (naq) Danio rerio cDNA clone naq48f08 5', mRNA sequence [DN903446]	2.10388	0.00654
ENSDART00000049061	Cdkn1bl protein (Fragment). [Source:Uniprot/SPTREMBL;Acc:Q6PH20] [ENSDART00000049061]	2.10452	1.33e-07
XM_001335430	PREDICTED: Danio rerio similar to alpha-6-fucosyltransferase (LOC797512), mRNA [XM_001335430]	2.10504	3.76e-06
TC360510	Unknown	2.10716	7.79e-05
TC339445	Unknown	2.10816	0.000495
NM_213150	Danio rerio zgc:64076 (zgc:64076), mRNA [NM_213150]	2.10909	0.00734
NM_001113624	Danio rerio hypothetical LOC571755 (LOC571755), mRNA [NM_001113624]	2.11212	0.00199
BM026461	ft08f11.y3 Zebrafish neuronal Danio rerio cDNA clone IMAGE:5080869 5', mRNA sequence [BM026461]	2.11402	2.15e-06
EE696181	AGENCOURT_90140473 NIH_ZGC_28 Danio rerio cDNA clone IMAGE:8799765 5', mRNA sequence [EE696181]	2.1166	2.38e-05
NM_131347	Danio rerio uroporphyrinogen decarboxylase (urod), mRNA [NM_131347]	2.1178	1.82e-06
NM_001020522	Danio rerio cytochrome P450, family 46, subfamily A, polypeptide 1 (cyp46a1), mRNA [NM_001020522]	2.11974	3.5e-05
NM_001008632	Danio rerio zgc:101531 (zgc:101531), mRNA [NM_001008632]	2.12081	0.000281
BC122446	Danio rerio cDNA clone IMAGE:8005315. [BC122446]	2.12118	2.65e-06
AI722562	fd19h01.x1 Sugano Kawakami zebrafish DRA Danio rerio cDNA clone IMAGE:2352049 3', mRNA sequence [AI722562]	2.12223	0.00504
BC133176	Danio rerio cDNA clone IMAGE:8149741, partial cds. [BC133176]	2.12516	0.000735
CT633618	CT633618 ZF_mu Danio rerio cDNA clone ZF_mu_93n22 5', mRNA sequence [CT633618]	2.12555	1.22e-05
TC347136	Unknown	2.1282	2.43e-06
TC317366	Unknown	2.13049	9.99e-05
ENSDART00000032307	Protein FAM46C. [Source:Uniprot/SWISSPROT;Acc:Q7ZUP1] [ENSDART00000032307]	2.13105	0.000833
TC359673	Unknown	2.13437	0.00134
CT718146	CT718146 ZF_mu Danio rerio cDNA clone ZF_mu_211l20 3', mRNA sequence [CT718146]	2.135	1.85e-06
CK687265	ZF101-P00042-DEPE-F_N24 GISZF101 Danio rerio cDNA clone IMAGE:7150106 5', mRNA sequence [CK687265]	2.13656	7.08e-06
NM_001002469	Danio rerio zgc:92890 (zgc:92890), mRNA [NM_001002469]	2.13694	0.00554
CN834871	AGENCOURT_24291098 NIH_ZGC_4 Danio rerio cDNA clone IMAGE:7288157 5', mRNA sequence [CN834871]	2.13729	0.000386
TC354172	Q29VA6_9ROSI (Q29VA6) ATP synthase beta subunit (Fragment), partial (5%) [TC354172]	2.13958	3.91e-05
ENSDART00000048445	hypothetical protein LOC556341 [Source:RefSeq_peptide;Acc:NP_001077014] [ENSDART00000048445]	2.14033	0.00719
NM_001038009	Danio rerio erythropoietin (epo), mRNA [NM_001038009]	2.14051	0.0013
XM_686988	Danio rerio TBC1 domain family, member 12a (tbc1d12a), mRNA [XM_686988]	2.14452	0.000106
ENSDART00000079803	PREDICTED: Danio rerio similar to N-myristoyltransferase 1 (LOC562651), mRNA [XM_686026]	2.14648	1.46e-11
NM_001034989	Danio rerio zgc:113360 (zgc:113360), mRNA [NM_001034989]	2.15153	9.92e-05
CT657300	CT657300 ZF_mu Danio rerio cDNA clone ZF_mu_7e06 3', mRNA sequence [CT657300]	2.15199	0.00394
NM_131031	Danio rerio bactin1 (bactin1), mRNA [NM_131031]	2.15459	1.17e-06
NM_001083029	Danio rerio zgc:158162 (zgc:158162), mRNA [NM_001083029]	2.15515	1.42e-06
NM_001013567	Danio rerio zgc:113115 (zgc:113115), mRNA [NM_001013567]	2.15537	1.14e-11
NM_200603	Danio rerio zgc:63550 (zgc:63550), mRNA [NM_200603]	2.15739	0.000114
ENSDART00000018441	PREDICTED: Danio rerio hypothetical LOC559288 (LOC559288), mRNA [XM_682618]	2.15766	0.000244
NM_001080686	Danio rerio zgc:158860 (zgc:158860), mRNA [NM_001080686]	2.16219	0.00512
NM_001080042	Danio rerio zgc:158339 (zgc:158339), mRNA [NM_001080042]	2.16233	1.25e-06
TC316751	Q7SZQ2_BRARE (Q7SZQ2) Inhibitor of DNA binding 2, dominant negative helix-loop-helix protein, complete [TC316751]	2.16436	0.000213
NM_001017740	Danio rerio zgc:112118 (zgc:112118), mRNA [NM_001017740]	2.16588	1.03e-06
NM_001018151	Danio rerio zgc:110643 (zgc:110643), mRNA [NM_001018151]	2.17136	0.00149
EH534130	FDR107-P00067-DEPE-R_L07 FDR107 Danio rerio cDNA clone FDR107-P00067-BR_L07 3', mRNA sequence [EH534130]	2.17344	0.00473
ENSDART00000076554	PREDICTED: Danio rerio similar to MGC115325 protein (LOC794433), mRNA [XM_001334362]	2.17351	0.000305
NM_001029960	Danio rerio si:ch211-181h6.2 (si:ch211-181h6.2), mRNA [NM_001029960]	2.1765	1.83e-07
NM_001030197	Danio rerio angiotensin II receptor-like 1b (agtrl1b), mRNA [NM_001030197]	2.17776	8.94e-07
ENSDART00000033566	Mothers against decapentaplegic homolog 1 (SMAD 1) (Mothers against DPP homolog 1) (Smad1). [Source:Uniprot/SWISSPROT;Acc:Q9I8V2] [ENSDART00000033566]	2.17804	0.00714
CO247652	AGENCOURT_25167110 NIH_ZGC_20 Danio rerio cDNA clone IMAGE:7290685 5', mRNA sequence [CO247652]	2.18838	0.000824
NM_213404	Danio rerio zgc:56632 (zgc:56632), mRNA [NM_213404]	2.19188	1.12e-06
TC335778	Q69566_9BETA (Q69566) U88, partial (10%) [TC335778]	2.19201	0.000251
NM_130970	Danio rerio islet2 (isl2), mRNA [NM_130970]	2.19306	3.89e-12
XR_029060	PREDICTED: Danio rerio similar to IQ motif containing GTPase activating protein 3, (LOC797628), mRNA [XR_029060]	2.1952	0.00132
NM_001040094	Danio rerio coproporphyrinogen oxidase (cpox), mRNA [NM_001040094]	2.19623	8.51e-07
NM_001017703	Danio rerio zgc:112208 (zgc:112208), mRNA [NM_001017703]	2.19955	8.77e-06
NM_200962	Danio rerio zgc:55863 (zgc:55863), mRNA [NM_200962]	2.20052	0.00434
ENSDART00000088469	PREDICTED: Danio rerio similar to ubiquitously transcribed tetratricopeptide repeat, X chromosome (LOC569277), mRNA [XM_692654]	2.20269	4.95e-05
XM_691326	PREDICTED: Danio rerio similar to hCG1813980, (LOC568014), mRNA [XM_691326]	2.20491	0.00315
AI878796	fc66g09.x1 Zebrafish WashU MPIMG EST Danio rerio cDNA clone IMAGE:3726400 3', mRNA sequence [AI878796]	2.2087	0.000508
NM_001008653	Danio rerio zgc:101683 (zgc:101683), mRNA [NM_001008653]	2.20936	6.53e-07
CT668589	CT668589 ZF_mu Danio rerio cDNA clone ZF_mu_161h08 3', mRNA sequence [CT668589]	2.20956	0.00348
NM_001045237	Danio rerio zgc:136538 (zgc:136538), mRNA [NM_001045237]	2.21131	6.1e-07
NM_001002749	Danio rerio zgc:100893 (zgc:100893), mRNA [NM_001002749]	2.21988	0.00249
NM_001002686	Danio rerio zgc:91854 (zgc:91854), mRNA [NM_001002686]	2.22088	8.43e-07
TC340205	Unknown	2.22571	7.74e-06
NM_001045317	Danio rerio zgc:136844 (zgc:136844), mRNA [NM_001045317]	2.22708	5.23e-07
EH471109	FDR103-P00038-DEPE-R_H12 FDR103 Danio rerio cDNA clone FDR103-P00038-BR_H12 3', mRNA sequence [EH471109]	2.23047	0.000343
TC347571	Q6NZW9_BRARE (Q6NZW9) Maf protein, partial (32%) [TC347571]	2.23051	8.42e-06
NM_001025458	Danio rerio transmembrane phosphatase with tensin homology (tpte), mRNA [NM_001025458]	2.23357	4.23e-06
ENSDART00000103491	PREDICTED: Danio rerio similar to retinoid binding protein 7 (LOC569308), mRNA [XM_692687]	2.23445	1.58e-06
ENSDART00000100882	Myoferlin (Fer-1-like protein 3). [Source:Uniprot/SWISSPROT;Acc:Q9NZM1] [ENSDART00000100882]	2.23595	0.00875
NM_001077549	Danio rerio doublecortin-like kinase 1 (dclk1), mRNA [NM_001077549]	2.23691	0.00179
CT718388	CT718388 ZF_mu Danio rerio cDNA clone ZF_mu_207e03 3', mRNA sequence [CT718388]	2.23777	0.00836
NM_001020591	Danio rerio synaptogyrin 3 (syngr3), mRNA [NM_001020591]	2.24141	9.26e-05
ENSDART00000066383	PREDICTED: Danio rerio similar to alpha globin type-2, transcript variant 2 (LOC561790), mRNA [XM_702789]	2.24202	1.45e-06
TC359333	Unknown	2.24381	0.000269
XM_700557	PREDICTED: Danio rerio hypothetical LOC564833, transcript variant 1 (LOC564833), mRNA [XM_700557]	2.24653	4.88e-07
NM_130962	Danio rerio islet1 (isl1), mRNA [NM_130962]	2.2467	3.3e-11
ENSDART00000088199	hypothetical protein LOC100002095 [Source:RefSeq_peptide;Acc:NP_001082923] [ENSDART00000088199]	2.24947	1.76e-06
NM_131461	Danio rerio endothelium-specific receptor tyrosine kinase 2 (tie2), mRNA [NM_131461]	2.25376	3.76e-07
NM_001045143	Danio rerio novel protein similar to vertebrate neuron navigator family (LOC567779), mRNA [NM_001045143]	2.25558	0.00135
NM_001004661	Danio rerio zgc:103682 (zgc:103682), mRNA [NM_001004661]	2.25826	5.03e-06
BC054902	Danio rerio cDNA clone IMAGE:2644579, partial cds. [BC054902]	2.25937	0.00708
NM_200414	Danio rerio cytochrome b-245, beta polypeptide (chronic granulomatous disease) (cybb), mRNA [NM_200414]	2.25938	8.16e-05
ENSDART00000023521	PREDICTED: Danio rerio hypothetical LOC564339 (LOC564339), mRNA [XM_687680]	2.2598	6.6e-05
CK362487	AGENCOURT_17185649 NIH_ZGC_4 Danio rerio cDNA clone IMAGE:7088971 5', mRNA sequence [CK362487]	2.27118	0.000201
NM_001018146	Danio rerio zgc:110667 (zgc:110667), mRNA [NM_001018146]	2.27474	0.000414
NM_001007760	Danio rerio membrane-associated protein 17 like (map17l), mRNA [NM_001007760]	2.28013	0.000759
XM_690384	PREDICTED: Danio rerio similar to brain RPTPmam4 (LOC567095), mRNA [XM_690384]	2.28161	3.98e-07
NM_131015	Danio rerio v-maf musculoaponeurotic fibrosarcoma oncogene family, protein B (avian) (mafb), mRNA [NM_131015]	2.2853	3.42e-07
ENSDART00000097515	Novel prtoein (Fragment). [Source:Uniprot/SPTREMBL;Acc:A3KQP6] [ENSDART00000097515]	2.28718	0.00684
CT662054	CT662054 ZF_mu Danio rerio cDNA clone ZF_mu_141e24 5', mRNA sequence [CT662054]	2.28844	0.00107
NM_213005	Danio rerio zgc:56140 (zgc:56140), mRNA [NM_213005]	2.29179	2.24e-08
CT649588	CT649588 ZF_mu Danio rerio cDNA clone ZF_mu_131f09 5', mRNA sequence [CT649588]	2.29354	0.00083
NM_131861	Danio rerio jagged 1a (jag1a), mRNA [NM_131861]	2.29674	3.05e-12
NM_001007314	Danio rerio zgc:92301 (zgc:92301), mRNA [NM_001007314]	2.29756	3.62e-07
NM_213179	Danio rerio zgc:85672 (zgc:85672), mRNA [NM_213179]	2.29986	0.000197
NM_131692	Danio rerio cardiac myosin light chain-1 (cmlc1), mRNA [NM_131692]	2.30022	1.8e-13
CK703942	ZF101-P00005-DEPE-R_G24 GISZF101 Danio rerio cDNA clone IMAGE:7136114 3', mRNA sequence [CK703942]	2.30125	0.00391
CO350383	DR_AOV_FL10_B04 adult ovary full-length (TLL) Danio rerio cDNA, mRNA sequence [CO350383]	2.30286	0.00527
TC359793	Q4HK36_CAMLA (Q4HK36) General glycosylation pathway protein, partial (3%) [TC359793]	2.30588	0.000756
NM_001002490	Danio rerio zgc:92855 (zgc:92855), mRNA [NM_001002490]	2.30743	0.00303
EH457720	FDR103-P00072-DEPE-F_O05 FDR103 Danio rerio cDNA clone FDR103-P00072-BR_O05 5', mRNA sequence [EH457720]	2.30973	2.09e-07
ENSDART00000066154	Hypothetical protein (Fragment). [Source:Uniprot/SPTREMBL;Acc:A3KNK7] [ENSDART00000066154]	2.31675	0.00398
ENSDART00000042478	LOC402794 protein (Fragment). [Source:Uniprot/SPTREMBL;Acc:Q7ZWE8] [ENSDART00000042478]	2.31801	2.89e-07
NM_194391	Danio rerio hematopoietic death receptor (hdr), mRNA [NM_194391]	2.31918	1.9e-07
TC311944	Unknown	2.31954	6.85e-06
EH461438	FDR103-P00011-DEPE-R_E24 FDR103 Danio rerio cDNA clone FDR103-P00011-BR_E24 3', mRNA sequence [EH461438]	2.3202	0.00289
NM_198980	Danio rerio zgc:56121 (zgc:56121), mRNA [NM_198980]	2.32137	2.11e-07
CD587717	RK042A4H11.T3 Zebrafish Kidney Marrow cDNA library Danio rerio cDNA clone RK042A4H11 5', mRNA sequence [CD587717]	2.32453	8.71e-06
AW420551	fj83a04.x1 zebrafish gridded kidney Danio rerio cDNA 3', mRNA sequence [AW420551]	2.32765	2.39e-05
TC325647	Q8LBJ2_ARATH (Q8LBJ2) Contains similarity to regulatory protein RecX, partial (5%) [TC325647]	2.32927	9.81e-07
ENSDART00000066934	Novel protein similar to vertebrate inter-alpha (Globulin) inhibitor H5 (ITIH5) (Fragment). [Source:Uniprot/SPTREMBL;Acc:Q5RHF3] [ENSDART00000066934]	2.33042	2.48e-11
EH523065	FDR107-P00037-DEPE-R_B20 FDR107 Danio rerio cDNA clone FDR107-P00037-BR_B20 3', mRNA sequence [EH523065]	2.33747	0.000492
BC071329	Danio rerio homeo box D10a, mRNA (cDNA clone MGC:86636 IMAGE:6893267), complete cds. [BC071329]	2.33817	1.82e-06
NM_131110	Danio rerio carbonic anhydrase (cahz), mRNA [NM_131110]	2.33843	5.99e-14
AI545543	fb70a09.x1 Zebrafish WashU MPIMG EST Danio rerio cDNA clone IMAGE:3717208 3', mRNA sequence [AI545543]	2.34779	0.00123
NM_001077251	Danio rerio zgc:153815 (zgc:153815), mRNA [NM_001077251]	2.35061	3.92e-08
NM_001080191	Danio rerio spermatogenesis associated 2 (spata2), mRNA [NM_001080191]	2.35497	2.04e-07
NM_001003776	Danio rerio zgc:100982 (zgc:100982), mRNA [NM_001003776]	2.35771	2.27e-06
ENSDART00000093606	Cytochrome c oxidase subunit 1 (EC 1.9.3.1) (Cytochrome c oxidase polypeptide I). [Source:Uniprot/SWISSPROT;Acc:Q9MIY8] [ENSDART00000093606]	2.36101	1.11e-07
NM_001003579	Danio rerio zgc:101052 (zgc:101052), mRNA [NM_001003579]	2.3642	7.93e-06
EH461664	FDR103-P00011-DEPE-R_O19 FDR103 Danio rerio cDNA clone FDR103-P00011-BR_O19 3', mRNA sequence [EH461664]	2.36913	0.000759
NM_001002524	Danio rerio zgc:92926 (zgc:92926), mRNA [NM_001002524]	2.37469	1.68e-05
TC349507	Unknown	2.37831	1.36e-07
BM184314	fv70h07.x1 Sugano SJD adult male Danio rerio cDNA clone IMAGE:5413885 3', mRNA sequence [BM184314]	2.38485	3.49e-06
ENSDART00000011915	platelet derived growth factor receptor alpha (pdgfra), mRNA [Source:RefSeq_dna;Acc:NM_131459] [ENSDART00000011915]	2.38605	9.26e-08
CT635404	CT635404 ZF_mu Danio rerio cDNA clone ZF_mu_63o08 5', mRNA sequence [CT635404]	2.38673	7.48e-07
TC360006	Unknown	2.38701	2.38e-07
NM_001110457	Danio rerio zgc:162298 (zgc:162298), mRNA [NM_001110457]	2.38776	0.000428
TC337892	XM_818392 acetyltransferase {Trypanosoma brucei} (exp=0; wgp=1; cg=0), partial (5%) [TC337892]	2.38995	4.04e-05
NM_131858	Danio rerio secreted frizzled-related protein 5 (sfrp5), mRNA [NM_131858]	2.39189	1.7e-07
EE214594	c5i06z2.f1 Danio rerio 12am (night) eye [EE214594]	2.3923	0.00681
NM_131511	Danio rerio frizzled homolog 9 (fzd9), mRNA [NM_131511]	2.39353	1.32e-06
TC341305	Unknown	2.40561	0.00386
CT643131	CT643131 ZF_mu Danio rerio cDNA clone ZF_mu_136m17 3', mRNA sequence [CT643131]	2.40678	1.39e-06
TC350653	Unknown	2.409	0.00131
TC323518	Unknown	2.40921	0.00435
NM_001082834	Danio rerio zgc:163057 (zgc:163057), mRNA [NM_001082834]	2.41194	6.96e-08
NM_001039806	Danio rerio endothelial PAS domain protein 1 (epas1), mRNA [NM_001039806]	2.41586	9e-06
ENSDART00000081770	Novel protein containing sushi domains (SCR repeats (Fragment)). [Source:Uniprot/SPTREMBL;Acc:A2BIP0] [ENSDART00000081770]	2.41659	6.32e-08
BG883662	fp13e05.x1 zebrafish gridded kidney Danio rerio cDNA clone IMAGE:4729448 3', mRNA sequence [BG883662]	2.41743	0.000198
BC135039	Danio rerio cDNA clone IMAGE:7165528. [BC135039]	2.41826	9.56e-08
XM_683405	PREDICTED: Danio rerio similar to Netrin G2 (LOC560014), mRNA [XM_683405]	2.41832	0.00966
NM_001024412	Danio rerio zgc:112045 (zgc:112045), mRNA [NM_001024412]	2.42557	3.43e-06
CT584881	CT584881 ZF_mu Danio rerio cDNA clone ZF_mu_58b21 5', mRNA sequence [CT584881]	2.42889	7.93e-08
NM_001111187	Danio rerio hypothetical LOC566376 (LOC566376), mRNA [NM_001111187]	2.42969	9.77e-07
EH534734	FDR107-P00069-DEPE-R_G07 FDR107 Danio rerio cDNA clone FDR107-P00069-BR_G07 3', mRNA sequence [EH534734]	2.43071	1.27e-07
TC336555	Unknown	2.43466	5.04e-08
NM_001077161	Danio rerio zgc:152875 (zgc:152875), mRNA [NM_001077161]	2.44644	0.0041
EH451924	FDR103-P00056-DEPE-F_O03 FDR103 Danio rerio cDNA clone FDR103-P00056-BR_O03 5', mRNA sequence [EH451924]	2.4483	2.13e-07
NM_131621	Danio rerio bone morphogenetic protein receptor, type 1a (bmpr1a), mRNA [NM_131621]	2.45006	0.000837
EB890749	11006408 ZF26XL Danio rerio cDNA clone 3518913, mRNA sequence [EB890749]	2.45736	0.000249
NM_001109719	Danio rerio zgc:171629 (zgc:171629), mRNA [NM_001109719]	2.46422	0.0061
CT717808	CT717808 ZF_mu Danio rerio cDNA clone ZF_mu_242c10 5', mRNA sequence [CT717808]	2.46492	5.83e-07
XM_689293	PREDICTED: Danio rerio similar to hCG33937, (LOC566028), mRNA [XM_689293]	2.46816	8.83e-07
TC355649	Unknown	2.47283	1.68e-07
NM_001079682	Danio rerio forkhead box E3 (foxe3), mRNA [NM_001079682]	2.47409	1.7e-07
ENSDART00000014674	Novel protein similar to human tachykinin, 1 (TAC1). [Source:Uniprot/SPTREMBL;Acc:A3KQK1] [ENSDART00000014674]	2.47724	0.000155
ENSDART00000090399	PREDICTED: Danio rerio polyductin-L (LOC569261), mRNA [XM_692636]	2.48519	0.00376
XM_677718	PREDICTED: Danio rerio similar to gefiltin (LOC555251), mRNA [XM_677718]	2.48891	2.91e-06
EH578664	FDR306-P00001-DEPE-F_L01 FDR306 Danio rerio cDNA clone FDR306-P00001-BR_L01 5', mRNA sequence [EH578664]	2.49029	3e-08
NM_131147	Danio rerio homeo box A11b (hoxa11b), mRNA [NM_131147]	2.49931	0.000424
TC326586	Unknown	2.50028	0.00254
AI943058	fc83g02.x1 Zebrafish WashU MPIMG EST Danio rerio cDNA clone IMAGE:3728018 3', mRNA sequence [AI943058]	2.50842	3.38e-06
CT685142	CT685142 ZF_mu Danio rerio cDNA clone ZF_mu_241f11 5', mRNA sequence [CT685142]	2.51605	3.48e-07
NM_001039990	Danio rerio zgc:123214 (zgc:123214), mRNA [NM_001039990]	2.5163	2.3e-06
NM_001040297	Danio rerio zgc:136586 (zgc:136586), mRNA [NM_001040297]	2.521	2.18e-08
TC342995	Q4TA48_TETNG (Q4TA48) Chromosome 10 SCAF7449, whole genome shotgun sequence, partial (96%) [TC342995]	2.52184	3.05e-07
TC340280	Q5V4A3_HALMA (Q5V4A3) Branched-chain amino acid ABC transporter ATP-binding protein, partial (5%) [TC340280]	2.53167	5.27e-05
NM_213241	Danio rerio sp8 transcription factor (sp8), mRNA [NM_213241]	2.54066	1.7e-08
XM_680698	PREDICTED: Danio rerio hypothetical LOC567674, transcript variant 1 (LOC567674), mRNA [XM_680698]	2.55435	0.000414
NM_001089337	Danio rerio zgc:158623 (zgc:158623), mRNA [NM_001089337]	2.5592	9.71e-07
CT606806	CT606806 ZF_mu Danio rerio cDNA clone ZF_mu_180f21 3', mRNA sequence [CT606806]	2.56241	0.00449
NM_175084	Danio rerio erythrocyte membrane protein band 4.1 (elliptocytosis 1, RH-linked) (epb41), mRNA [NM_175084]	2.56898	1.28e-08
TC314143	Q4TFN0_TETNG (Q4TFN0) Chromosome undetermined SCAF4361, whole genome shotgun sequence, partial (12%) [TC314143]	2.58314	1.3e-05
TC317033	AF325921 DNA-dependent ATPase SNF2H {Mus musculus} (exp=-1; wgp=0; cg=0), partial (29%) [TC317033]	2.58412	3.38e-05
NM_131682	Danio rerio aminolevulinate, delta-, synthetase 2 (alas2), mRNA [NM_131682]	2.5869	4.43e-17
BI863963	ft15f10.x1 Zebrafish neuronal Danio rerio cDNA clone IMAGE:5081634 3', mRNA sequence [BI863963]	2.59312	0.000533
ENSDART00000079420	Novel protein similar to non-vertebrate ubiquitin family. [Source:Uniprot/SPTREMBL;Acc:A2BHB8] [ENSDART00000079420]	2.60402	1.24e-07
BM778878	fx23g09.y1 Zebrafish C32 14 somite embryo Danio rerio cDNA clone IMAGE:5620816 5', mRNA sequence [BM778878]	2.60951	2.04e-08
ENSDART00000061500	Novel protein (Fragment). [Source:Uniprot/SPTREMBL;Acc:Q5RIY9] [ENSDART00000061500]	2.61661	4.32e-08
TC363127	Q6W6V5_CANFA (Q6W6V5) Olfactory receptor family 2 subfamily A (Fragment), partial (12%) [TC363127]	2.6335	0.000597
NM_001077773	Danio rerio zgc:113443 (zgc:113443), mRNA [NM_001077773]	2.64905	8.62e-09
NM_131784	Danio rerio BMP and activin membrane-bound inhibitor (Xenopus laevis) homolog (bambi), mRNA [NM_131784]	2.64963	3.79e-16
NM_001002189	Danio rerio zgc:91871 (zgc:91871), mRNA [NM_001002189]	2.6504	5.8e-09
TC339608	Q9K9X7_BACHD (Q9K9X7) BH2517 protein, partial (11%) [TC339608]	2.66114	8.13e-05
NM_001009917	Danio rerio transferrin receptor 1a (tfr1a), mRNA [NM_001009917]	2.66606	0.00515
NM_001044856	Danio rerio OCIA domain containing 2 (ociad2), mRNA [NM_001044856]	2.67395	1.12e-08
AW175480	fi25f06.x1 Sugano Kawakami zebrafish DRA Danio rerio cDNA clone IMAGE:2602211 3', mRNA sequence [AW175480]	2.67575	3.9e-08
NM_131070	Danio rerio midkine-related growth factor (mdka), mRNA [NM_131070]	2.68514	0.000223
NM_001004010	Danio rerio zgc:100872 (zgc:100872), mRNA [NM_001004010]	2.68676	4.17e-09
XM_001342995	PREDICTED: Danio rerio hypothetical protein LOC100003467 (LOC100003467), partial mRNA [XM_001342995]	2.68943	4.42e-09
DT059977	AGENCOURT_56113398 NIH_ZGC_10 Danio rerio cDNA clone IMAGE:7999614 5', mRNA sequence [DT059977]	2.69187	0.000197
NM_200454	Danio rerio zgc:63553 (zgc:63553), mRNA [NM_200454]	2.69245	3.33e-07
TC321361	Q90Y15_TETFL (Q90Y15) STAT4, partial (3%) [TC321361]	2.69401	1.43e-06
TC364288	AF036006 Danio rerio 16S ribosomal RNA gene, mitochondrial gene for mitochondrial RNA, complete sequence, partial (17%) [TC364288]	2.69478	0.00343
NM_131273	Danio rerio muscle segment homeobox E (msxe), mRNA [NM_131273]	2.69517	4.58e-09
CT668656	CT668656 ZF_mu Danio rerio cDNA clone ZF_mu_161p22 5', mRNA sequence [CT668656]	2.70258	0.000228
NM_001079837	Danio rerio si:dkey-121a11.4 (si:dkey-121a11.4), mRNA [NM_001079837]	2.70609	5.82e-05
NM_001009907	Danio rerio zgc:92492 (zgc:92492), mRNA [NM_001009907]	2.72427	9.41e-08
ENSDART00000047616	PREDICTED: Danio rerio hypothetical LOC560703 (LOC560703), mRNA [XM_684099]	2.72583	1.2e-05
NM_201002	Danio rerio zgc:55604 (zgc:55604), mRNA [NM_201002]	2.7339	0.00136
NM_001007360	Danio rerio zgc:103675 (zgc:103675), mRNA [NM_001007360]	2.73488	0.00163
NM_001017704	Danio rerio zgc:112207 (zgc:112207), mRNA [NM_001017704]	2.75206	1.7e-08
TC345421	Unknown	2.75549	4.94e-05
NM_001012483	Danio rerio cellular retinoic acid binding protein 2, b (crabp2b), mRNA [NM_001012483]	2.75979	1.26e-05
NM_001113583	Danio rerio hypothetical LOC557841 (LOC557841), mRNA [NM_001113583]	2.77484	0.000659
NM_131166	Danio rerio homeo box D10a (hoxd10a), mRNA [NM_131166]	2.77503	4.4e-05
NM_131342	Danio rerio bone morphogenetic protein 4 (bmp4), mRNA [NM_131342]	2.77923	4.96e-11
NM_131249	Danio rerio even-skipped homeobox 1 (evx1), mRNA [NM_131249]	2.80009	2.17e-07
TC317454	Q31MS9_SYNP7 (Q31MS9) Pyridine nucleotide transhydrogenase beta subunit, partial (4%) [TC317454]	2.81849	1.2e-09
XM_691567	PREDICTED: Danio rerio hypothetical LOC568246 (LOC568246), mRNA [XM_691567]	2.82425	0.000899
NM_001037243	Danio rerio LIM homeodomain type transcription factor Lhx9 (lhx9), mRNA [NM_001037243]	2.8267	3.18e-06
EE210503	a8n01z2.f1 Danio rerio 12am (night) eye [EE210503]	2.83715	0.000226
NM_001034993	Danio rerio Indian hedgehog homolog a (ihha), mRNA [NM_001034993]	2.83991	2.82e-20
TC358599	Unknown	2.84248	3.57e-05
BM071654	fu86a07.x1 Gong zebrafish ovary Danio rerio cDNA clone IMAGE:5377812 3', mRNA sequence [BM071654]	2.84491	0.00582
XR_029316	PREDICTED: Danio rerio similar to coagulation factor VIII (LOC563620), mRNA [XR_029316]	2.84984	3.38e-06
CK690700	ZF101-P00053-DEPE-F2_I22 GISZF101 Danio rerio cDNA clone IMAGE:7154208 5', mRNA sequence [CK690700]	2.85406	2.19e-06
TC351570	Unknown	2.85493	3.36e-06
ENSDART00000105508	Alpha-2,6-sialyltransferase ST6GalNAc II (Fragment). [Source:Uniprot/SPTREMBL;Acc:Q6ZYN6] [ENSDART00000105508]	2.86793	6.43e-06
CT660089	CT660089 ZF_mu Danio rerio cDNA clone ZF_mu_1n24 3', mRNA sequence [CT660089]	2.87639	1.24e-08
NM_131234	Danio rerio GATA-binding protein 1 (gata1), mRNA [NM_131234]	2.88495	1.56e-09
NM_001002489	Danio rerio zgc:92857 (zgc:92857), mRNA [NM_001002489]	2.8991	0.00931
EH605763	FDR306-P00027-DEPE-R_N02 FDR306 Danio rerio cDNA clone FDR306-P00027-BR_N02 3', mRNA sequence [EH605763]	2.90206	7.55e-10
NM_198338	Danio rerio solute carrier family 4, anion exchanger, member 1 (slc4a1), mRNA [NM_198338]	2.92745	2.22e-21
TC338026	Unknown	2.92917	0.00356
AI959609	fd11g11.x1 Zebrafish WashU MPIMG EST Danio rerio cDNA clone IMAGE:3730628 3', mRNA sequence [AI959609]	2.93056	0.00389
EH433603	FDR103-P00006-DEPE-F_C08 FDR103 Danio rerio cDNA clone FDR103-P00006-BR_C08 5', mRNA sequence [EH433603]	2.94091	0.00301
AW421212	fj94c10.x1 zebrafish gridded kidney Danio rerio cDNA 3', mRNA sequence [AW421212]	2.94834	0.000364
BQ169306	STR00254 segmentation stage cDNA library Danio rerio cDNA clone CB216 3' similar to 47 KDA HEAT SHOCK PROTEIN, mRNA sequence [BQ169306]	2.95549	0.00309
EH530045	FDR107-P00056-DEPE-R_G20 FDR107 Danio rerio cDNA clone FDR107-P00056-BR_G20 3', mRNA sequence [EH530045]	2.96445	0.00333
BI882919	fm99g02.x1 Zebrafish Research Genetics C32 fin Danio rerio cDNA clone IMAGE:4469162 3', mRNA sequence [BI882919]	2.97258	0.000742
XM_679447	PREDICTED: Danio rerio hypothetical LOC556606 (LOC556606), mRNA [XM_679447]	2.99364	8.91e-06
ENSDART00000077434	Unknown	2.99684	0.00654
NM_001045051	Danio rerio SMAD family member 6b, mRNA [NM_001045051]	3.00598	9.48e-09
AW826486	fk62e09.x1 Zebrafish adult retina cDNA Danio rerio cDNA 3', mRNA sequence [AW826486]	3.00868	0.00023
CK704951	ZF101-P00008-DEPE-R_M14 GISZF101 Danio rerio cDNA clone IMAGE:7137400 3', mRNA sequence [CK704951]	3.02625	0.00705
NM_001045206	Danio rerio si:dkeyp-119b4.5 (si:dkeyp-119b4.5), mRNA [NM_001045206]	3.02856	1.22e-06
NM_214741	Danio rerio zgc:85705 (zgc:85705), mRNA [NM_214741]	3.04941	9.94e-09
NM_001005941	Danio rerio zgc:103708 (zgc:103708), mRNA [NM_001005941]	3.07733	1.39e-10
TC336553	Unknown	3.07806	0.00482
ENSDART00000105050	Hypothetical protein (Fragment). [Source:Uniprot/SPTREMBL;Acc:Q0P4B5] [ENSDART00000105050]	3.09217	7e-07
BG306017	fm15h04.x1 Zebrafish adult retina cDNA Danio rerio cDNA clone IMAGE:4146654 3', mRNA sequence [BG306017]	3.09277	6.24e-05
EH441673	FDR103-P00028-DEPE-F_K17 FDR103 Danio rerio cDNA clone FDR103-P00028-BR_K17 5', mRNA sequence [EH441673]	3.09487	0.00222
BC090791	Danio rerio cDNA clone IMAGE:7156899. [BC090791]	3.11369	0.00478
XM_688571	PREDICTED: Danio rerio hypothetical LOC565291 (LOC565291), mRNA [XM_688571]	3.11649	1.61e-05
CT588772	CT588772 ZF_mu Danio rerio cDNA clone ZF_mu_57g22 3', mRNA sequence [CT588772]	3.12403	0.000177
NM_131776	Danio rerio thyroid transcription factor 1b (titf1b), mRNA [NM_131776]	3.13284	2.32e-08
XM_001345111	PREDICTED: Danio rerio hypothetical protein LOC100006382 (LOC100006382), mRNA [XM_001345111]	3.13646	4.04e-07
NM_131305	Danio rerio distal-less homeobox gene 1a (dlx1a), mRNA [NM_131305]	3.1417	1.55e-10
EH611877	FDR306-P00044-DEPE-R_B16 FDR306 Danio rerio cDNA clone FDR306-P00044-BR_B16 3', mRNA sequence [EH611877]	3.14385	0.00039
CN024489	AGENCOURT_20192716 NIH_ZGC_14 Danio rerio cDNA clone IMAGE:7231138 5', mRNA sequence [CN024489]	3.16184	2.05e-06
NM_001002212	Danio rerio zgc:91804 (zgc:91804), mRNA [NM_001002212]	3.16626	2.52e-09
BE557538	fl04h02.y1 Zebrafish Research Genetics C32 fin Danio rerio cDNA 5', mRNA sequence [BE557538]	3.17472	0.00444
NM_183066	Danio rerio hemoglobin alpha embryonic-3 (hbae3), mRNA [NM_183066]	3.18205	6.07e-11
CK362411	AGENCOURT_17083038 NIH_ZGC_4 Danio rerio cDNA clone IMAGE:7090478 5', mRNA sequence [CK362411]	3.19584	5.82e-11
NM_207070	Danio rerio zgc:77364 (zgc:77364), mRNA [NM_207070]	3.20305	9.46e-11
CT705773	CT705773 ZF_mu Danio rerio cDNA clone ZF_mu_202n18 3', mRNA sequence [CT705773]	3.20924	0.000425
EH592931	FDR306-P00040-DEPE-F_D08 FDR306 Danio rerio cDNA clone FDR306-P00040-BR_D08 5', mRNA sequence [EH592931]	3.2303	4.46e-11
NM_201291	Danio rerio inhibitor of DNA binding 2, dominant negative helix-loop-helix protein (id2), mRNA [NM_201291]	3.2332	3.32e-25
NM_001008613	Danio rerio zgc:103458 (zgc:103458), mRNA [NM_001008613]	3.24007	2.29e-10
ENSDART00000067595	FDR202-P00029-DEPE-F_B03 FDR202 Danio rerio cDNA clone FDR202-P00029-BR_B03 5', mRNA sequence [EH546362]	3.24306	0.00247
TC349880	Unknown	3.2505	0.00028
NM_001003631	Danio rerio zgc:100929 (zgc:100929), mRNA [NM_001003631]	3.25228	3.68e-11
NM_001024447	Danio rerio tumor necrosis factor b (TNF superfamily, member 2) (tnfb), mRNA [NM_001024447]	3.26426	3.89e-11
CT610120	CT610120 ZF_mu Danio rerio cDNA clone ZF_mu_146c23 3', mRNA sequence [CT610120]	3.26461	1.96e-05
NM_001079979	Danio rerio zgc:153913 (zgc:153913), mRNA [NM_001079979]	3.26846	6.07e-05
NM_001009986	Danio rerio zgc:92218 (zgc:92218), mRNA [NM_001009986]	3.27959	0.0016
NM_001083851	Danio rerio hypothetical LOC570194 (LOC570194), mRNA [NM_001083851]	3.31041	0.000389
TC353634	Unknown	3.33705	4.43e-10
NM_001089430	Danio rerio chemokine (C-X-C motif) receptor 3.1 (cxcr3.1), mRNA [NM_001089430]	3.36019	2.81e-05
ENSDART00000029631	PREDICTED: Danio rerio similar to nuclear mitotic apparatus protein 1, (LOC572344), partial mRNA [XM_696053]	3.36398	0.00541
TC354453	Unknown	3.40906	8.38e-05
NM_001112733	Danio rerio ventricular myosin heavy chain (vmhc), mRNA [NM_001112733]	3.42128	1.53e-09
BG302848	fl39h10.x1 Sugano Kawakami zebrafish DRA Danio rerio cDNA clone IMAGE:3816427 3', mRNA sequence [BG302848]	3.44261	0.00125
TC352857	Q4SDT2_TETNG (Q4SDT2) Chromosome 1 SCAF14632, whole genome shotgun sequence. (Fragment), partial (31%) [TC352857]	3.45644	9.36e-06
NM_152893	Danio rerio troponin T2, cardiac (tnnt2), mRNA [NM_152893]	3.52979	7.33e-29
AF533659	Danio rerio embryonic shield mRNA, complete sequence. [AF533659]	3.5362	5.26e-12
NM_001077451	Danio rerio zgc:153457 (zgc:153457), mRNA [NM_001077451]	3.54268	0.000242
NM_201008	Danio rerio zgc:56282 (zgc:56282), mRNA [NM_201008]	3.56364	0.00873
TC311106	Q6QAQ1_PIG (Q6QAQ1) Cytoskeletal beta actin (Fragment), partial (51%) [TC311106]	3.57389	0.001
TC364846	Q9W709_PLEPL (Q9W709) Transposase, partial (32%) [TC364846]	3.60181	2.15e-08
CT622349	CT622349 ZF_mu Danio rerio cDNA clone ZF_mu_72f07 3', mRNA sequence [CT622349]	3.60673	0.00319
NM_130936	Danio rerio Kruppel-like factor d (klfd), mRNA [NM_130936]	3.62834	5.8e-05
NM_001020487	Danio rerio BMP binding endothelial regulator (bmper), mRNA [NM_001020487]	3.62838	3.72e-12
TC301719	Q4FAI8_BRARE (Q4FAI8) Tenascin-C, complete [TC301719]	3.65232	2.49e-12
NM_153643	Danio rerio activin A receptor type II-like 1 (acvrl1), mRNA [NM_153643]	3.66154	4.43e-12
AY329628	Danio rerio embryonic globin beta e3 mRNA, partial cds. [AY329628]	3.67584	2.15e-12
CK705824	ZF101-P00011-DEPE-R_F08 GISZF101 Danio rerio cDNA clone IMAGE:7138378 3', mRNA sequence [CK705824]	3.68057	7.9e-09
EH606218	FDR306-P00029-DEPE-R_A11 FDR306 Danio rerio cDNA clone FDR306-P00029-BR_A11 3', mRNA sequence [EH606218]	3.68105	0.00176
AL716948	AL716948 Danio rerio embryonic inner ear subtracted cDNA Danio rerio cDNA clone BN0AA023ZB02 3', mRNA sequence [AL716948]	3.68398	1.16e-06
NM_131329	Danio rerio myosin light chain, regulatory A (mylc2a), mRNA [NM_131329]	3.69981	2.56e-12
XM_686495	PREDICTED: Danio rerio ST6 (alpha-N-acetyl-neuraminyl-2,3-beta-galactosyl-1,3)-N-acetylgalactosaminide alpha-2,6-sialyltransferase (st6galnac), mRNA [XM_686495]	3.7075	4.02e-05
TC349099	Unknown	3.72865	1.23e-05
NM_131052	Danio rerio T-box gene 6 (tbx6), mRNA [NM_131052]	3.74542	3.32e-12
AI878648	fc63e07.x1 Zebrafish WashU MPIMG EST Danio rerio cDNA clone IMAGE:3726084 3', mRNA sequence [AI878648]	3.75957	1.33e-08
NM_182940	Danio rerio hemoglobin alpha embryonic-1 (hbae1), mRNA [NM_182940]	3.76517	1.27e-12
TC310305	Unknown	3.77161	0.000241
ENSDART00000045677	BHLH transcription factor (Fragment). [Source:Uniprot/SPTREMBL;Acc:Q5SEJ1] [ENSDART00000045677]	3.7888	9.81e-23
NM_131146	Danio rerio cytochrome P450, subfamily XXVIA, polypeptide 1 (cyp26a1), mRNA [NM_131146]	3.79024	5.12e-32
TC359436	Unknown	3.83467	1.24e-08
NM_131306	Danio rerio distal-less homeobox gene 5a (dlx5a), mRNA [NM_131306]	3.84872	8.06e-13
TC363795	Unknown	3.84941	1.36e-08
TC347987	Q4RT14_TETNG (Q4RT14) Chromosome 12 SCAF14999, whole genome shotgun sequence. (Fragment), partial (9%) [TC347987]	3.87428	1.12e-07
ENSDART00000085218	PREDICTED: Danio rerio hypothetical protein LOC797812 (LOC797812), mRNA [XM_001338239]	3.88009	1.21e-12
TC338191	Unknown	3.89392	1.89e-07
ENSDART00000074971	hypothetical protein LOC554116 [Source:RefSeq_peptide;Acc:NP_001019583] [ENSDART00000074971]	3.90323	3.89e-08
XM_687292	PREDICTED: Danio rerio similar to Protease, serine, 23, transcript variant 2 (LOC563933), mRNA [XM_687292]	3.91495	0.000143
CT631636	CT631636 ZF_mu Danio rerio cDNA clone ZF_mu_71l16 3', mRNA sequence [CT631636]	3.91758	0.000336
NM_175082	Danio rerio MAD, mothers against decapentaplegic homolog 7 (Drosophila) (smad7), mRNA [NM_175082]	3.95979	5.63e-13
XR_030110	PREDICTED: Danio rerio similar to ryanodine receptor 2 (cardiac), (LOC100007959), mRNA [XR_030110]	3.98136	1.02e-05
NM_131276	Danio rerio muscle segment homeobox D (msxd), mRNA [NM_131276]	4.02811	3.27e-13
CO353413	DR_ATE_FL14_G04 adult testis full-length (TLL) Danio rerio cDNA, mRNA sequence [CO353413]	4.05348	2.4e-06
NM_001015058	Danio rerio hemoglobin beta embryonic-3 (hbbe3), mRNA [NM_001015058]	4.06555	2.44e-13
BC071507	Danio rerio hemoglobin alpha embryonic-3, mRNA (cDNA clone MGC:86867 IMAGE:6903618), complete cds. [BC071507]	4.06715	2.42e-13
TC308572	HXABB_BRARE (Q9DDU1) Homeobox protein Hox-A11b (Hox-A11), complete [TC308572]	4.07967	8.99e-05
CT618811	CT618811 ZF_mu Danio rerio cDNA clone ZF_mu_53c06 3', mRNA sequence [CT618811]	4.08015	2.28e-13
NM_200443	Danio rerio zgc:63668 (zgc:63668), mRNA [NM_200443]	4.08375	0.000281
XM_001342225	PREDICTED: Danio rerio similar to fibropellin Ia (LOC100002486), mRNA [XM_001342225]	4.13744	0.00707
TC312305	Unknown	4.18468	0.00499
ENSDART00000098757	hypothetical protein LOC541436 [Source:RefSeq_peptide;Acc:NP_001013579] [ENSDART00000098757]	4.18788	5.47e-13
BI708697	fs58b09.y1 Zebrafish SJD day 8 fin regeneration Danio rerio cDNA clone IMAGE:5071840 5', mRNA sequence [BI708697]	4.18962	1.46e-13
NM_001013350	Danio rerio zgc:113016 (zgc:113016), mRNA [NM_001013350]	4.21123	4.33e-13
CT691876	CT691876 ZF_mu Danio rerio cDNA clone ZF_mu_206n16 3', mRNA sequence [CT691876]	4.22676	0.00297
NM_001013324	Danio rerio zgc:113257 (zgc:113257), mRNA [NM_001013324]	4.24797	1.35e-12
NM_001003732	Danio rerio zgc:92428 (zgc:92428), mRNA [NM_001003732]	4.2753	1.51e-13
NM_001110393	Danio rerio similar to Olig3 protein (LOC566728), mRNA [NM_001110393]	4.31048	5.38e-13
CT703415	CT703415 ZF_mu Danio rerio cDNA clone ZF_mu_171p17 3', mRNA sequence [CT703415]	4.36239	9.18e-12
NM_131260	Danio rerio muscle segment homeobox B (msxb), mRNA [NM_131260]	4.36537	8.73e-39
TC342305	Unknown	4.39813	1.29e-13
NM_131589	Danio rerio thyroid transcription factor 1a (titf1a), mRNA [NM_131589]	4.4464	1.56e-11
AB055670	Danio rerio D103 mRNA, 3'UTR, partial sequence. [AB055670]	4.52904	5.04e-11
NM_001110375	Danio rerio si:dkey-253d23.4 (si:dkey-253d23.4), mRNA [NM_001110375]	4.62165	0.00648
NM_131235	Danio rerio GATA-binding protein 5 (gata5), mRNA [NM_131235]	4.62849	3.1e-14
CD604845	RK009A1A02.T7 Zebrafish Kidney Marrow cDNA library Danio rerio cDNA clone RK009A1A02 3', mRNA sequence [CD604845]	4.63416	0.00877
CT719001	CT719001 ZF_mu Danio rerio cDNA clone ZF_mu_211c23 3', mRNA sequence [CT719001]	4.63878	0.0098
NM_001025498	Danio rerio si:ch211-260g14.3 (si:ch211-260g14.3), mRNA [NM_001025498]	4.6673	3.31e-07
CT702048	CT702048 ZF_mu Danio rerio cDNA clone ZF_mu_189o14 3', mRNA sequence [CT702048]	4.68955	0.000143
NM_205698	Danio rerio iroquois homeobox protein 4a (irx4a), mRNA [NM_205698]	4.72665	2.32e-14
BG883896	fp23h05.x1 zebrafish gridded kidney Danio rerio cDNA clone IMAGE:4744184 3', mRNA sequence [BG883896]	4.72906	0.00339
AI476962	fb55h10.x1 Zebrafish WashU MPIMG EST Danio rerio cDNA clone IMAGE:3715843 3', mRNA sequence [AI476962]	4.73795	1.08e-05
NM_001024448	Danio rerio myosin, heavy polypeptide 11, smooth muscle (myh11), mRNA [NM_001024448]	4.79273	3.99e-13
BC142759	Danio rerio cDNA clone IMAGE:7212495, partial cds. [BC142759]	4.98297	1e-06
CT643209	CT643209 ZF_mu Danio rerio cDNA clone ZF_mu_95h09 3', mRNA sequence [CT643209]	5.06862	0.000139
NM_001101670	Danio rerio zgc:158110 (zgc:158110), mRNA [NM_001101670]	5.08477	7.88e-11
NM_213300	Danio rerio zgc:77548 (zgc:77548), mRNA [NM_213300]	5.1262	9.54e-08
NM_200238	Danio rerio zgc:55779 (zgc:55779), mRNA [NM_200238]	5.17371	0.00292
NM_001013492	Danio rerio zgc:110777 (zgc:110777), mRNA [NM_001013492]	5.26152	9.69e-10
NM_131419	Danio rerio NK2 transcription factor related 7 (nkx2.7), mRNA [NM_131419]	5.27564	0
NM_199217	Danio rerio four and a half LIM domains (fhl), mRNA [NM_199217]	5.36235	2.38e-12
ENSDART00000037371	Hypothetical protein (Fragment). [Source:Uniprot/SPTREMBL;Acc:Q0P4B5] [ENSDART00000037371]	5.42495	2.85e-15
CK706892	ZF101-P00015-DEPE-R_B22 GISZF101 Danio rerio cDNA clone IMAGE:7139832 3', mRNA sequence [CK706892]	5.44848	0.00985
NM_001017714	Danio rerio zgc:112186 (zgc:112186), mRNA [NM_001017714]	5.4814	0.00956
NM_001004009	Danio rerio zgc:100881 (zgc:100881), mRNA [NM_001004009]	5.51597	2.03e-05
NM_212960	Danio rerio sp9 transcription factor (sp9), mRNA [NM_212960]	5.6097	7.97e-16
NM_131698	Danio rerio ventral homeobox (vox), mRNA [NM_131698]	5.63886	1.75e-18
NM_131233	Danio rerio GATA-binding protein 2 (gata2), mRNA [NM_131233]	5.63914	5.49e-16
ENSDART00000065407	hypoxia-inducible factor 1, alpha subunit, like 2 [Source:RefSeq_peptide;Acc:NP_001012371] [ENSDART00000065407]	5.65564	0.00274
TC328422	Q6GNU7_XENLA (Q6GNU7) MGC80867 protein, partial (22%) [TC328422]	5.65617	0.00872
ENSDART00000091899	PREDICTED: Danio rerio similar to Uncharacterized protein C20orf160 (LOC568661), mRNA [XM_692004]	5.67379	8.01e-09
BI881820	fn10f12.x1 Zebrafish WashU MPIMG EST Danio rerio cDNA clone IMAGE:4489894 3' similar to contains element MER32 repetitive element ;, mRNA sequence [BI881820]	5.69813	0.00724
NM_131423	Danio rerio NK2 transcription factor related 3 (nkx2.3), mRNA [NM_131423]	5.74823	0
TC353712	Unknown	5.79407	5.26e-16
ENSDART00000105499	Unknown	5.79844	0.00537
ENSDART00000014176	Homeobox protein MSH-C. [Source:Uniprot/SWISSPROT;Acc:Q01703] [ENSDART00000014176]	5.80243	3.77e-16
TC344194	NM_200032 l(3)mbt-like 2 {Danio rerio} (exp=-1; wgp=0; cg=0), partial (10%) [TC344194]	5.93548	0.00507
TC349858	BC071408 zgc:86733 protein {Danio rerio} (exp=-1; wgp=0; cg=0), complete [TC349858]	5.93685	0.00712
NM_131003	Danio rerio dickkopf 1 (dkk1), mRNA [NM_131003]	5.97706	2.22e-16
NM_001025507	Danio rerio type II CAX cation/proton exchanger (cax1), mRNA [NM_001025507]	5.98946	0.000132
NM_200751	Danio rerio zgc:73213 (zgc:73213), mRNA [NM_200751]	6.05607	8.14e-06
CT624948	CT624948 ZF_mu Danio rerio cDNA clone ZF_mu_111e12 5', mRNA sequence [CT624948]	6.12223	3.36e-05
TC319170	Unknown	6.16624	0.00402
NM_194393	Danio rerio guanylate cyclase activator 1C (guca1c), mRNA [NM_194393]	6.16814	0.00277
NM_131297	Danio rerio distal-less homeobox gene 2b (dlx2b), mRNA [NM_131297]	6.17533	1.41e-12
NM_001045162	Danio rerio crumbs homolog 2, like (crb2l), mRNA [NM_001045162]	6.28491	3.98e-05
NM_131502	Danio rerio forkhead box H1 (foxh1), mRNA [NM_131502]	6.32272	0.00762
TC334934	Q2VT45_BRARE (Q2VT45) Relaxin 3a, complete [TC334934]	6.35682	0.0012
CT624826	CT624826 ZF_mu Danio rerio cDNA clone ZF_mu_114h21 3', mRNA sequence [CT624826]	6.47177	0.000115
CD014819	hac25c07.x1 MPZFRiken1 Danio rerio cDNA clone IMAGE:6923319 3', mRNA sequence [CD014819]	6.49501	0.0019
ENSDART00000066179	neuropeptide FF-amide peptide precursor like [Source:RefSeq_peptide;Acc:NP_899189] [ENSDART00000066179]	6.54369	0.000789
ENSDART00000061829	Novel protein (Fragment). [Source:Uniprot/SPTREMBL;Acc:Q5SP97] [ENSDART00000061829]	6.65091	0.00265
NM_001002531	Danio rerio zgc:92913 (zgc:92913), mRNA [NM_001002531]	6.65213	0.00154
DQ060537	Danio rerio homeobox a9b (hoxa9b) mRNA, partial cds. [DQ060537]	6.68648	1.47e-06
CK705367	ZF101-P00009-DEPE-R_O20 GISZF101 Danio rerio cDNA clone IMAGE:7137838 3', mRNA sequence [CK705367]	6.71617	0.00131
TC332725	Unknown	6.77059	0.00102
CO354956	DR_ATE_NRM02_H01 adult testis normalized (TLL) Danio rerio cDNA, mRNA sequence [CO354956]	6.79284	0.00109
NM_183074	Danio rerio ventrally expressed dharma/bozozok antagonist (ved), mRNA [NM_183074]	6.80278	0
NM_131836	Danio rerio single-minded homolog 2 (Drosophila) (sim2), mRNA [NM_131836]	6.88392	0.000939
ENSDART00000034544	caspase a [Source:ZFIN;Acc:ZDB-GENE-000616-3] [ENSDART00000034544]	6.99839	0.000974
NM_001033722	Danio rerio zgc:136220 (zgc:136220), mRNA [NM_001033722]	7.06521	3.34e-07
EH604563	FDR306-P00024-DEPE-R_J20 FDR306 Danio rerio cDNA clone FDR306-P00024-BR_J20 3', mRNA sequence [EH604563]	7.09725	0.000577
NM_001079991	Danio rerio zgc:158314 (zgc:158314), mRNA [NM_001079991]	7.10568	2.16e-17
CT669162	CT669162 ZF_mu Danio rerio cDNA clone ZF_mu_12e11 3', mRNA sequence [CT669162]	7.10985	0.000498
TC350820	Unknown	7.12148	1.13e-05
NM_131311	Danio rerio distal-less homeobox gene 2a (dlx2a), mRNA [NM_131311]	7.16662	1.86e-17
NM_001110479	Danio rerio zgc:162329 (zgc:162329), mRNA [NM_001110479]	7.19726	2.81e-06
ENSDART00000077637	hypothetical protein LOC335407 [Source:RefSeq_peptide;Acc:NP_997902] [ENSDART00000077637]	7.25594	7.18e-18
TC361627	Unknown	7.40443	0.00032
TC344814	Unknown	7.46935	0.000344
BI673802	ft32g08.x1 Gong zebrafish testis Danio rerio cDNA clone IMAGE:5152335 3', mRNA sequence [BI673802]	7.4814	0.000836
CT665975	CT665975 ZF_mu Danio rerio cDNA clone ZF_mu_122g10 3', mRNA sequence [CT665975]	7.57171	0.000273
TC324321	Unknown	7.69929	0.000903
NM_131323	Danio rerio distal-less homeobox gene 6a (dlx6a), mRNA [NM_131323]	7.70374	6.1e-17
XM_693899	PREDICTED: Danio rerio similar to TSP-EAR protein (LOC570420), mRNA [XM_693899]	7.73483	0.000233
ENSDART00000073512	PREDICTED: Danio rerio hypothetical protein LOC100004613 (LOC100004613), mRNA [XM_001341994]	7.75045	8.68e-18
EH508701	FDR107-P00069-DEPE-F_K14 FDR107 Danio rerio cDNA clone FDR107-P00069-BR_K14 5', mRNA sequence [EH508701]	7.786	0.000611
TC336537	Unknown	7.84532	0.000186
NM_199514	Danio rerio bHLH transcription factor 3 (olig3), mRNA [NM_199514]	8.09416	0
TC322734	Unknown	8.11925	0.0001
TC346423	Unknown	8.28172	4.75e-07
NM_212737	Danio rerio zgc:66409 (zgc:66409), mRNA [NM_212737]	8.30323	0.000103
CT592442	CT592442 ZF_mu Danio rerio cDNA clone ZF_mu_44a13 3', mRNA sequence [CT592442]	8.32022	8.39e-05
NM_001039809	Danio rerio zgc:136823 (zgc:136823), mRNA [NM_001039809]	8.48435	2.83e-06
TC361030	Unknown	8.56857	1.1e-06
TC349257	Q5BJC5_BRARE (Q5BJC5) Zgc:123019 protein (Fragment), partial (23%) [TC349257]	8.70707	2.48e-11
TC312481	MIASRR16 Artemia mitochondrial 16S ribosomal RNA, complete [TC312481]	8.81029	2.54e-05
NM_001008594	Danio rerio zgc:101843 (zgc:101843), mRNA [NM_001008594]	9.02731	0.000922
NM_001005775	Danio rerio phosphatidylinositol-4-phosphate 5-kinase, type I, beta (pip5k1b), mRNA [NM_001005775]	9.03498	2.12e-05
BM316038	fw68c07.x1 Gong zebrafish testis Danio rerio cDNA clone IMAGE:5615604 3', mRNA sequence [BM316038]	9.42001	1.41e-05
NM_201080	Danio rerio zgc:55614 (zgc:55614), mRNA [NM_201080]	9.47368	1.35e-05
ENSDART00000079784	PREDICTED: Danio rerio hypothetical LOC562569 (LOC562569), mRNA [XM_685949]	9.5005	7.44e-06
EH609364	FDR306-P00037-DEPE-R_F24 FDR306 Danio rerio cDNA clone FDR306-P00037-BR_F24 3', mRNA sequence [EH609364]	9.96812	8.81e-06
NM_001080612	Danio rerio zgc:158795 (zgc:158795), mRNA [NM_001080612]	10.1473	2.9e-06
BC122459	Danio rerio hypothetical protein LOC795210, mRNA (cDNA clone IMAGE:7001332), partial cds. [BC122459]	10.4167	1.54e-06
CT689997	CT689997 ZF_mu Danio rerio cDNA clone ZF_mu_155o23 3', mRNA sequence [CT689997]	10.4975	3.28e-06
NM_182858	Danio rerio cellular retinoic acid binding protein 1 (crabp1), mRNA [NM_182858]	10.6381	7.11e-16
CT691495	CT691495 ZF_mu Danio rerio cDNA clone ZF_mu_232o12 3', mRNA sequence [CT691495]	10.7482	2.55e-07
NM_170765	Danio rerio T-cell leukemia, homeobox 1 (tlx1), mRNA [NM_170765]	10.8935	2.75e-19
EH582042	FDR306-P00011-DEPE-F_A17 FDR306 Danio rerio cDNA clone FDR306-P00011-BR_A17 5', mRNA sequence [EH582042]	11.3206	1.29e-19
NM_199802	Danio rerio zgc:55306 (zgc:55306), mRNA [NM_199802]	11.6115	5.54e-12
ENSDART00000077861	PREDICTED: Danio rerio hypothetical protein LOC100005060 (LOC100005060), mRNA [XM_001344175]	11.7383	2.14e-07
AF114428	Danio rerio cardiac myosin light chain 2 (cmlc2) mRNA, partial cds. [AF114428]	11.9916	5.66e-14
TC348454	Unknown	12.6627	9.24e-08
BC067541	Danio rerio noggin 2, mRNA (cDNA clone MGC:85600 IMAGE:6963732), complete cds. [BC067541]	12.6725	2.71e-19
NM_131626	Danio rerio heart and neural crest derivatives expressed transcript 2 (hand2), mRNA [NM_131626]	12.9383	3.64e-20
CT596713	CT596713 ZF_mu Danio rerio cDNA clone ZF_mu_85l23 5', mRNA sequence [CT596713]	13.2615	1.16e-08
ENSDART00000059250	PREDICTED: Danio rerio hypothetical LOC567921 (LOC567921), mRNA [XM_691235]	13.965	5.93e-18
CK027740	AGENCOURT_16619246 NIH_ZGC_7 Danio rerio cDNA clone IMAGE:7053349 5', mRNA sequence [CK027740]	13.9827	3.49e-08
NM_001080078	Danio rerio zgc:158358 (zgc:158358), mRNA [NM_001080078]	14.6551	1.75e-09
CN014967	AGENCOURT_20195611 NIH_ZGC_14 Danio rerio cDNA clone IMAGE:7228781 5', mRNA sequence [CN014967]	15.1325	1e-13
CK354039	AGENCOURT_17056245 NIH_ZGC_9 Danio rerio cDNA clone IMAGE:7072876 5', mRNA sequence [CK354039]	16.201	4.72e-14
NM_001102384	Danio rerio T-box gene 2a (tbx2a), mRNA [NM_001102384]	16.4678	6.92e-11
NM_130983	Danio rerio noggin 1 (nog1), mRNA [NM_130983]	16.8407	6.04e-21
NM_131272	Danio rerio muscle segment homeobox C (msxc), mRNA [NM_131272]	19.0479	3.62e-18
NM_131055	Danio rerio floating head (flh), mRNA [NM_131055]	21.4845	4.37e-14
NM_001105600	Danio rerio hypothetical protein LOC799806 (LOC799806), mRNA [NM_001105600]	24.0883	1.08e-15
TC363928	Unknown	27.3158	6.09e-13
NM_001020718	Danio rerio zgc:113199 (zgc:113199), mRNA [NM_001020718]	29.357	8.11e-17
NM_131844	Danio rerio v-maf musculoaponeurotic fibrosarcoma (avian) oncogene homolog (maf), mRNA [NM_131844]	33.4512	2.15e-18
EH498631	FDR107-P00042-DEPE-F_C19 FDR107 Danio rerio cDNA clone FDR107-P00042-BR_C19 5', mRNA sequence [EH498631]	69.3585	1.06e-21
NM_131360	Danio rerio bone morphogenetic protein 2b (bmp2b), mRNA [NM_131360]	82.6837	5.17e-23
CK689187	ZF101-P00048-DEPE-F2_J04 GISZF101 Danio rerio cDNA clone IMAGE:7152294 5', mRNA sequence [CK689187]	114.424	1.11e-22
